# Supplementary material for: Integration of Multiple Genomic and Phenotype Data to Infer Novel miRNA-Disease Associations
Source: PLoS One. 2016 Feb 5;11(2):e0148521. doi: 10.1371/journal.pone.0148521 (PMC4743935; doi:10.1371/journal.pone.0148521)
Supplement: S2 File — (XLS) [file pone.0148521.s004.xls]

## Sheet: Sheet1
Experimentally validated miRNA targets
miRNA ID	entrez gene ID
hsa-let-7a-3p	25852
hsa-let-7a-3p	689
hsa-let-7a-3p	1431
hsa-let-7a-3p	145282
hsa-let-7a-3p	57337
hsa-let-7a-3p	54093
hsa-let-7a-3p	51592
hsa-let-7a-5p	52
hsa-let-7a-5p	836
hsa-let-7a-5p	1603
hsa-let-7a-5p	23405
hsa-let-7a-5p	192670
hsa-let-7a-5p	8669
hsa-let-7a-5p	8091
hsa-let-7a-5p	3265
hsa-let-7a-5p	3690
hsa-let-7a-5p	3845
hsa-let-7a-5p	79727
hsa-let-7a-5p	80306
hsa-let-7a-5p	4988
hsa-let-7a-5p	4771
hsa-let-7a-5p	27190
hsa-let-7a-5p	4893
hsa-let-7a-5p	639
hsa-let-7a-5p	55225
hsa-let-7a-5p	8634
hsa-let-7a-5p	54498
hsa-let-7a-5p	131405
hsa-let-7a-5p	27034
hsa-let-7a-5p	60
hsa-let-7a-5p	91
hsa-let-7a-5p	158
hsa-let-7a-5p	26523
hsa-let-7a-5p	27161
hsa-let-7a-5p	64853
hsa-let-7a-5p	8227
hsa-let-7a-5p	501
hsa-let-7a-5p	9949
hsa-let-7a-5p	271
hsa-let-7a-5p	90806
hsa-let-7a-5p	26057
hsa-let-7a-5p	196527
hsa-let-7a-5p	314
hsa-let-7a-5p	351
hsa-let-7a-5p	10620
hsa-let-7a-5p	151188
hsa-let-7a-5p	57561
hsa-let-7a-5p	10973
hsa-let-7a-5p	259266
hsa-let-7a-5p	84938
hsa-let-7a-5p	488
hsa-let-7a-5p	490
hsa-let-7a-5p	4508
hsa-let-7a-5p	526
hsa-let-7a-5p	11273
hsa-let-7a-5p	283358
hsa-let-7a-5p	9031
hsa-let-7a-5p	11176
hsa-let-7a-5p	586
hsa-let-7a-5p	596
hsa-let-7a-5p	10018
hsa-let-7a-5p	54880
hsa-let-7a-5p	57448
hsa-let-7a-5p	658
hsa-let-7a-5p	665
hsa-let-7a-5p	2186
hsa-let-7a-5p	55108
hsa-let-7a-5p	53339
hsa-let-7a-5p	84811
hsa-let-7a-5p	55216
hsa-let-7a-5p	56913
hsa-let-7a-5p	145741
hsa-let-7a-5p	154743
hsa-let-7a-5p	85026
hsa-let-7a-5p	817
hsa-let-7a-5p	23066
hsa-let-7a-5p	23589
hsa-let-7a-5p	841
hsa-let-7a-5p	842
hsa-let-7a-5p	9133
hsa-let-7a-5p	894
hsa-let-7a-5p	900
hsa-let-7a-5p	80381
hsa-let-7a-5p	23607
hsa-let-7a-5p	1604
hsa-let-7a-5p	994
hsa-let-7a-5p	8317
hsa-let-7a-5p	1021
hsa-let-7a-5p	1026
hsa-let-7a-5p	283638
hsa-let-7a-5p	1073
hsa-let-7a-5p	84916
hsa-let-7a-5p	81570
hsa-let-7a-5p	7555
hsa-let-7a-5p	11064
hsa-let-7a-5p	22818
hsa-let-7a-5p	4512
hsa-let-7a-5p	84987
hsa-let-7a-5p	4513
hsa-let-7a-5p	131544
hsa-let-7a-5p	1431
hsa-let-7a-5p	1457
hsa-let-7a-5p	9150
hsa-let-7a-5p	120227
hsa-let-7a-5p	8886
hsa-let-7a-5p	8560
hsa-let-7a-5p	90957
hsa-let-7a-5p	1660
hsa-let-7a-5p	9829
hsa-let-7a-5p	51611
hsa-let-7a-5p	1825
hsa-let-7a-5p	79659
hsa-let-7a-5p	1869
hsa-let-7a-5p	1870
hsa-let-7a-5p	1938
hsa-let-7a-5p	1956
hsa-let-7a-5p	1960
hsa-let-7a-5p	8663
hsa-let-7a-5p	2081
hsa-let-7a-5p	23086
hsa-let-7a-5p	2146
hsa-let-7a-5p	2149
hsa-let-7a-5p	90268
hsa-let-7a-5p	220965
hsa-let-7a-5p	284069
hsa-let-7a-5p	2193
hsa-let-7a-5p	26190
hsa-let-7a-5p	23770
hsa-let-7a-5p	22862
hsa-let-7a-5p	96459
hsa-let-7a-5p	3169
hsa-let-7a-5p	22887
hsa-let-7a-5p	55632
hsa-let-7a-5p	90480
hsa-let-7a-5p	8729
hsa-let-7a-5p	10985
hsa-let-7a-5p	9453
hsa-let-7a-5p	2752
hsa-let-7a-5p	26003
hsa-let-7a-5p	2814
hsa-let-7a-5p	2824
hsa-let-7a-5p	11321
hsa-let-7a-5p	2969
hsa-let-7a-5p	2975
hsa-let-7a-5p	9328
hsa-let-7a-5p	3005
hsa-let-7a-5p	3037
hsa-let-7a-5p	10014
hsa-let-7a-5p	3007
hsa-let-7a-5p	8360
hsa-let-7a-5p	8349
hsa-let-7a-5p	440689
hsa-let-7a-5p	3159
hsa-let-7a-5p	3151
hsa-let-7a-5p	9987
hsa-let-7a-5p	11100
hsa-let-7a-5p	3203
hsa-let-7a-5p	3214
hsa-let-7a-5p	3221
hsa-let-7a-5p	3298
hsa-let-7a-5p	10075
hsa-let-7a-5p	3376
hsa-let-7a-5p	3481
hsa-let-7a-5p	3569
hsa-let-7a-5p	80895
hsa-let-7a-5p	57117
hsa-let-7a-5p	10527
hsa-let-7a-5p	9445
hsa-let-7a-5p	3712
hsa-let-7a-5p	221895
hsa-let-7a-5p	84502
hsa-let-7a-5p	284252
hsa-let-7a-5p	23135
hsa-let-7a-5p	57189
hsa-let-7a-5p	158358
hsa-let-7a-5p	23633
hsa-let-7a-5p	337882
hsa-let-7a-5p	23367
hsa-let-7a-5p	10184
hsa-let-7a-5p	11006
hsa-let-7a-5p	128077
hsa-let-7a-5p	4000
hsa-let-7a-5p	474170
hsa-let-7a-5p	115353
hsa-let-7a-5p	4048
hsa-let-7a-5p	4214
hsa-let-7a-5p	5600
hsa-let-7a-5p	8888
hsa-let-7a-5p	23389
hsa-let-7a-5p	4211
hsa-let-7a-5p	56257
hsa-let-7a-5p	131965
hsa-let-7a-5p	57534
hsa-let-7a-5p	4352
hsa-let-7a-5p	29088
hsa-let-7a-5p	51116
hsa-let-7a-5p	57380
hsa-let-7a-5p	56181
hsa-let-7a-5p	4522
hsa-let-7a-5p	57509
hsa-let-7a-5p	4609
hsa-let-7a-5p	4649
hsa-let-7a-5p	60560
hsa-let-7a-5p	4686
hsa-let-7a-5p	4535
hsa-let-7a-5p	4536
hsa-let-7a-5p	4540
hsa-let-7a-5p	25915
hsa-let-7a-5p	55471
hsa-let-7a-5p	4720
hsa-let-7a-5p	4741
hsa-let-7a-5p	10825
hsa-let-7a-5p	84901
hsa-let-7a-5p	4790
hsa-let-7a-5p	22795
hsa-let-7a-5p	25836
hsa-let-7a-5p	28511
hsa-let-7a-5p	4833
hsa-let-7a-5p	9221
hsa-let-7a-5p	4864
hsa-let-7a-5p	4884
hsa-let-7a-5p	8856
hsa-let-7a-5p	11163
hsa-let-7a-5p	11164
hsa-let-7a-5p	9818
hsa-let-7a-5p	80228
hsa-let-7a-5p	27143
hsa-let-7a-5p	54852
hsa-let-7a-5p	94104
hsa-let-7a-5p	63935
hsa-let-7a-5p	9659
hsa-let-7a-5p	5195
hsa-let-7a-5p	84295
hsa-let-7a-5p	57157
hsa-let-7a-5p	23556
hsa-let-7a-5p	5295
hsa-let-7a-5p	5351
hsa-let-7a-5p	10957
hsa-let-7a-5p	5454
hsa-let-7a-5p	5520
hsa-let-7a-5p	10113
hsa-let-7a-5p	5683
hsa-let-7a-5p	80142
hsa-let-7a-5p	7803
hsa-let-7a-5p	9444
hsa-let-7a-5p	5872
hsa-let-7a-5p	5885
hsa-let-7a-5p	5903
hsa-let-7a-5p	125950
hsa-let-7a-5p	23543
hsa-let-7a-5p	10180
hsa-let-7a-5p	494115
hsa-let-7a-5p	85021
hsa-let-7a-5p	8780
hsa-let-7a-5p	6156
hsa-let-7a-5p	6165
hsa-let-7a-5p	6124
hsa-let-7a-5p	6133
hsa-let-7a-5p	6204
hsa-let-7a-5p	6207
hsa-let-7a-5p	6210
hsa-let-7a-5p	6229
hsa-let-7a-5p	6189
hsa-let-7a-5p	6191
hsa-let-7a-5p	3921
hsa-let-7a-5p	9125
hsa-let-7a-5p	6241
hsa-let-7a-5p	64766
hsa-let-7a-5p	55095
hsa-let-7a-5p	23231
hsa-let-7a-5p	27244
hsa-let-7a-5p	83667
hsa-let-7a-5p	80854
hsa-let-7a-5p	10291
hsa-let-7a-5p	6433
hsa-let-7a-5p	6472
hsa-let-7a-5p	150094
hsa-let-7a-5p	221150
hsa-let-7a-5p	6574
hsa-let-7a-5p	113829
hsa-let-7a-5p	55343
hsa-let-7a-5p	56916
hsa-let-7a-5p	9887
hsa-let-7a-5p	27293
hsa-let-7a-5p	6631
hsa-let-7a-5p	6643
hsa-let-7a-5p	58533
hsa-let-7a-5p	6667
hsa-let-7a-5p	65244
hsa-let-7a-5p	6711
hsa-let-7a-5p	6427
hsa-let-7a-5p	132204
hsa-let-7a-5p	84447
hsa-let-7a-5p	23118
hsa-let-7a-5p	6877
hsa-let-7a-5p	27097
hsa-let-7a-5p	51616
hsa-let-7a-5p	6897
hsa-let-7a-5p	10915
hsa-let-7a-5p	7057
hsa-let-7a-5p	51014
hsa-let-7a-5p	55858
hsa-let-7a-5p	85019
hsa-let-7a-5p	55254
hsa-let-7a-5p	169200
hsa-let-7a-5p	51075
hsa-let-7a-5p	84231
hsa-let-7a-5p	85363
hsa-let-7a-5p	7204
hsa-let-7a-5p	8295
hsa-let-7a-5p	10099
hsa-let-7a-5p	55001
hsa-let-7a-5p	79989
hsa-let-7a-5p	11334
hsa-let-7a-5p	55236
hsa-let-7a-5p	55833
hsa-let-7a-5p	9898
hsa-let-7a-5p	55585
hsa-let-7a-5p	9690
hsa-let-7a-5p	22888
hsa-let-7a-5p	29128
hsa-let-7a-5p	115426
hsa-let-7a-5p	85451
hsa-let-7a-5p	151531
hsa-let-7a-5p	9097
hsa-let-7a-5p	7410
hsa-let-7a-5p	7421
hsa-let-7a-5p	9686
hsa-let-7a-5p	9277
hsa-let-7a-5p	11180
hsa-let-7a-5p	26100
hsa-let-7a-5p	11060
hsa-let-7a-5p	124245
hsa-let-7a-5p	84240
hsa-let-7a-5p	677
hsa-let-7a-5p	9203
hsa-let-7a-5p	339324
hsa-let-7a-5p	9422
hsa-let-7a-5p	148254
hsa-let-7a-5p	23060
hsa-let-7a-5p	23361
hsa-let-7a-5p	84146
hsa-let-7a-5p	155061
hsa-let-7a-5p	284323
hsa-let-7a-5p	5715
hsa-let-7b-3p	80856
hsa-let-7b-3p	6860
hsa-let-7b-5p	605
hsa-let-7b-5p	595
hsa-let-7b-5p	993
hsa-let-7b-5p	997
hsa-let-7b-5p	1021
hsa-let-7b-5p	8091
hsa-let-7b-5p	643865
hsa-let-7b-5p	79727
hsa-let-7b-5p	5414
hsa-let-7b-5p	10299
hsa-let-7b-5p	54715
hsa-let-7b-5p	80755
hsa-let-7b-5p	26574
hsa-let-7b-5p	23456
hsa-let-7b-5p	11194
hsa-let-7b-5p	4363
hsa-let-7b-5p	23
hsa-let-7b-5p	25
hsa-let-7b-5p	31
hsa-let-7b-5p	55
hsa-let-7b-5p	2180
hsa-let-7b-5p	60
hsa-let-7b-5p	71
hsa-let-7b-5p	81
hsa-let-7b-5p	90956
hsa-let-7b-5p	107
hsa-let-7b-5p	79602
hsa-let-7b-5p	23394
hsa-let-7b-5p	11047
hsa-let-7b-5p	27125
hsa-let-7b-5p	3268
hsa-let-7b-5p	178
hsa-let-7b-5p	26523
hsa-let-7b-5p	27161
hsa-let-7b-5p	192669
hsa-let-7b-5p	25909
hsa-let-7b-5p	10768
hsa-let-7b-5p	64853
hsa-let-7b-5p	10270
hsa-let-7b-5p	10327
hsa-let-7b-5p	501
hsa-let-7b-5p	10195
hsa-let-7b-5p	273
hsa-let-7b-5p	64682
hsa-let-7b-5p	26057
hsa-let-7b-5p	283373
hsa-let-7b-5p	55139
hsa-let-7b-5p	81611
hsa-let-7b-5p	84168
hsa-let-7b-5p	244
hsa-let-7b-5p	653145
hsa-let-7b-5p	728113
hsa-let-7b-5p	26985
hsa-let-7b-5p	26060
hsa-let-7b-5p	353
hsa-let-7b-5p	367
hsa-let-7b-5p	372
hsa-let-7b-5p	23647
hsa-let-7b-5p	55114
hsa-let-7b-5p	23092
hsa-let-7b-5p	7984
hsa-let-7b-5p	1820
hsa-let-7b-5p	10620
hsa-let-7b-5p	54622
hsa-let-7b-5p	23204
hsa-let-7b-5p	10776
hsa-let-7b-5p	10973
hsa-let-7b-5p	41
hsa-let-7b-5p	439
hsa-let-7b-5p	443
hsa-let-7b-5p	79058
hsa-let-7b-5p	83858
hsa-let-7b-5p	11101
hsa-let-7b-5p	23192
hsa-let-7b-5p	79065
hsa-let-7b-5p	475
hsa-let-7b-5p	476
hsa-let-7b-5p	488
hsa-let-7b-5p	4508
hsa-let-7b-5p	535
hsa-let-7b-5p	9296
hsa-let-7b-5p	342371
hsa-let-7b-5p	6311
hsa-let-7b-5p	11273
hsa-let-7b-5p	550
hsa-let-7b-5p	6790
hsa-let-7b-5p	9212
hsa-let-7b-5p	9529
hsa-let-7b-5p	7917
hsa-let-7b-5p	22893
hsa-let-7b-5p	7916
hsa-let-7b-5p	11177
hsa-let-7b-5p	9031
hsa-let-7b-5p	11176
hsa-let-7b-5p	55212
hsa-let-7b-5p	55653
hsa-let-7b-5p	586
hsa-let-7b-5p	54880
hsa-let-7b-5p	63035
hsa-let-7b-5p	631
hsa-let-7b-5p	632
hsa-let-7b-5p	332
hsa-let-7b-5p	57448
hsa-let-7b-5p	655
hsa-let-7b-5p	665
hsa-let-7b-5p	6046
hsa-let-7b-5p	7862
hsa-let-7b-5p	27154
hsa-let-7b-5p	114781
hsa-let-7b-5p	7832
hsa-let-7b-5p	28969
hsa-let-7b-5p	55088
hsa-let-7b-5p	80195
hsa-let-7b-5p	738
hsa-let-7b-5p	91894
hsa-let-7b-5p	80018
hsa-let-7b-5p	79794
hsa-let-7b-5p	57213
hsa-let-7b-5p	81556
hsa-let-7b-5p	56913
hsa-let-7b-5p	57095
hsa-let-7b-5p	54953
hsa-let-7b-5p	92667
hsa-let-7b-5p	54978
hsa-let-7b-5p	80304
hsa-let-7b-5p	55471
hsa-let-7b-5p	56951
hsa-let-7b-5p	134553
hsa-let-7b-5p	253714
hsa-let-7b-5p	81688
hsa-let-7b-5p	51236
hsa-let-7b-5p	771
hsa-let-7b-5p	59283
hsa-let-7b-5p	10241
hsa-let-7b-5p	822
hsa-let-7b-5p	23589
hsa-let-7b-5p	865
hsa-let-7b-5p	23468
hsa-let-7b-5p	23466
hsa-let-7b-5p	56267
hsa-let-7b-5p	84317
hsa-let-7b-5p	79879
hsa-let-7b-5p	64925
hsa-let-7b-5p	8900
hsa-let-7b-5p	890
hsa-let-7b-5p	891
hsa-let-7b-5p	9133
hsa-let-7b-5p	894
hsa-let-7b-5p	896
hsa-let-7b-5p	899
hsa-let-7b-5p	900
hsa-let-7b-5p	54619
hsa-let-7b-5p	8812
hsa-let-7b-5p	219771
hsa-let-7b-5p	977
hsa-let-7b-5p	10421
hsa-let-7b-5p	975
hsa-let-7b-5p	4267
hsa-let-7b-5p	128869
hsa-let-7b-5p	83879
hsa-let-7b-5p	55143
hsa-let-7b-5p	10423
hsa-let-7b-5p	54901
hsa-let-7b-5p	1059
hsa-let-7b-5p	201161
hsa-let-7b-5p	10036
hsa-let-7b-5p	1105
hsa-let-7b-5p	1107
hsa-let-7b-5p	1108
hsa-let-7b-5p	55636
hsa-let-7b-5p	27243
hsa-let-7b-5p	51652
hsa-let-7b-5p	54480
hsa-let-7b-5p	54108
hsa-let-7b-5p	9391
hsa-let-7b-5p	25792
hsa-let-7b-5p	26586
hsa-let-7b-5p	1152
hsa-let-7b-5p	1164
hsa-let-7b-5p	9635
hsa-let-7b-5p	9685
hsa-let-7b-5p	10845
hsa-let-7b-5p	23277
hsa-let-7b-5p	152100
hsa-let-7b-5p	2776
hsa-let-7b-5p	55748
hsa-let-7b-5p	26505
hsa-let-7b-5p	23019
hsa-let-7b-5p	4848
hsa-let-7b-5p	8161
hsa-let-7b-5p	29099
hsa-let-7b-5p	22820
hsa-let-7b-5p	9318
hsa-let-7b-5p	4512
hsa-let-7b-5p	4513
hsa-let-7b-5p	4514
hsa-let-7b-5p	1349
hsa-let-7b-5p	79974
hsa-let-7b-5p	29894
hsa-let-7b-5p	54973
hsa-let-7b-5p	1399
hsa-let-7b-5p	1431
hsa-let-7b-5p	1453
hsa-let-7b-5p	1457
hsa-let-7b-5p	1488
hsa-let-7b-5p	10664
hsa-let-7b-5p	1503
hsa-let-7b-5p	9646
hsa-let-7b-5p	8454
hsa-let-7b-5p	8453
hsa-let-7b-5p	8452
hsa-let-7b-5p	1523
hsa-let-7b-5p	1544
hsa-let-7b-5p	1573
hsa-let-7b-5p	84418
hsa-let-7b-5p	153090
hsa-let-7b-5p	55861
hsa-let-7b-5p	28988
hsa-let-7b-5p	10238
hsa-let-7b-5p	117159
hsa-let-7b-5p	1635
hsa-let-7b-5p	79077
hsa-let-7b-5p	1662
hsa-let-7b-5p	10521
hsa-let-7b-5p	8886
hsa-let-7b-5p	11218
hsa-let-7b-5p	9188
hsa-let-7b-5p	55794
hsa-let-7b-5p	51428
hsa-let-7b-5p	54555
hsa-let-7b-5p	9191
hsa-let-7b-5p	9909
hsa-let-7b-5p	8562
hsa-let-7b-5p	1676
hsa-let-7b-5p	55526
hsa-let-7b-5p	8449
hsa-let-7b-5p	56919
hsa-let-7b-5p	90957
hsa-let-7b-5p	1660
hsa-let-7b-5p	1729
hsa-let-7b-5p	23405
hsa-let-7b-5p	1737
hsa-let-7b-5p	10395
hsa-let-7b-5p	1756
hsa-let-7b-5p	64215
hsa-let-7b-5p	55735
hsa-let-7b-5p	22826
hsa-let-7b-5p	26052
hsa-let-7b-5p	23268
hsa-let-7b-5p	80005
hsa-let-7b-5p	5977
hsa-let-7b-5p	56896
hsa-let-7b-5p	374946
hsa-let-7b-5p	1819
hsa-let-7b-5p	1829
hsa-let-7b-5p	1832
hsa-let-7b-5p	11266
hsa-let-7b-5p	54935
hsa-let-7b-5p	1778
hsa-let-7b-5p	22873
hsa-let-7b-5p	1871
hsa-let-7b-5p	1875
hsa-let-7b-5p	1876
hsa-let-7b-5p	144455
hsa-let-7b-5p	85403
hsa-let-7b-5p	80267
hsa-let-7b-5p	1915
hsa-let-7b-5p	9521
hsa-let-7b-5p	1938
hsa-let-7b-5p	9813
hsa-let-7b-5p	30844
hsa-let-7b-5p	27102
hsa-let-7b-5p	8891
hsa-let-7b-5p	8663
hsa-let-7b-5p	8664
hsa-let-7b-5p	1973
hsa-let-7b-5p	1974
hsa-let-7b-5p	1982
hsa-let-7b-5p	2005
hsa-let-7b-5p	255520
hsa-let-7b-5p	64834
hsa-let-7b-5p	83460
hsa-let-7b-5p	2022
hsa-let-7b-5p	9583
hsa-let-7b-5p	955
hsa-let-7b-5p	2033
hsa-let-7b-5p	23136
hsa-let-7b-5p	64167
hsa-let-7b-5p	23085
hsa-let-7b-5p	2067
hsa-let-7b-5p	51290
hsa-let-7b-5p	51614
hsa-let-7b-5p	30001
hsa-let-7b-5p	2108
hsa-let-7b-5p	2147
hsa-let-7b-5p	9415
hsa-let-7b-5p	54491
hsa-let-7b-5p	84668
hsa-let-7b-5p	131408
hsa-let-7b-5p	84908
hsa-let-7b-5p	55719
hsa-let-7b-5p	84293
hsa-let-7b-5p	51571
hsa-let-7b-5p	79850
hsa-let-7b-5p	157638
hsa-let-7b-5p	84191
hsa-let-7b-5p	2177
hsa-let-7b-5p	10160
hsa-let-7b-5p	26190
hsa-let-7b-5p	2237
hsa-let-7b-5p	53834
hsa-let-7b-5p	80308
hsa-let-7b-5p	2314
hsa-let-7b-5p	2316
hsa-let-7b-5p	22862
hsa-let-7b-5p	221937
hsa-let-7b-5p	55572
hsa-let-7b-5p	80020
hsa-let-7b-5p	11167
hsa-let-7b-5p	79068
hsa-let-7b-5p	9513
hsa-let-7b-5p	126626
hsa-let-7b-5p	63917
hsa-let-7b-5p	2590
hsa-let-7b-5p	2597
hsa-let-7b-5p	26130
hsa-let-7b-5p	2627
hsa-let-7b-5p	283459
hsa-let-7b-5p	8729
hsa-let-7b-5p	10985
hsa-let-7b-5p	51573
hsa-let-7b-5p	10220
hsa-let-7b-5p	81544
hsa-let-7b-5p	25929
hsa-let-7b-5p	79760
hsa-let-7b-5p	84340
hsa-let-7b-5p	79017
hsa-let-7b-5p	9453
hsa-let-7b-5p	2720
hsa-let-7b-5p	2739
hsa-let-7b-5p	80772
hsa-let-7b-5p	29997
hsa-let-7b-5p	2778
hsa-let-7b-5p	2782
hsa-let-7b-5p	55094
hsa-let-7b-5p	54865
hsa-let-7b-5p	10243
hsa-let-7b-5p	2821
hsa-let-7b-5p	2824
hsa-let-7b-5p	79971
hsa-let-7b-5p	9289
hsa-let-7b-5p	2882
hsa-let-7b-5p	134266
hsa-let-7b-5p	2931
hsa-let-7b-5p	2935
hsa-let-7b-5p	2936
hsa-let-7b-5p	2969
hsa-let-7b-5p	2975
hsa-let-7b-5p	9329
hsa-let-7b-5p	84705
hsa-let-7b-5p	2992
hsa-let-7b-5p	2997
hsa-let-7b-5p	2998
hsa-let-7b-5p	64412
hsa-let-7b-5p	3030
hsa-let-7b-5p	9421
hsa-let-7b-5p	3035
hsa-let-7b-5p	54801
hsa-let-7b-5p	3054
hsa-let-7b-5p	54919
hsa-let-7b-5p	3070
hsa-let-7b-5p	3280
hsa-let-7b-5p	9146
hsa-let-7b-5p	3091
hsa-let-7b-5p	204851
hsa-let-7b-5p	3006
hsa-let-7b-5p	8358
hsa-let-7b-5p	3098
hsa-let-7b-5p	3159
hsa-let-7b-5p	3146
hsa-let-7b-5p	3157
hsa-let-7b-5p	9987
hsa-let-7b-5p	3185
hsa-let-7b-5p	3191
hsa-let-7b-5p	11100
hsa-let-7b-5p	3237
hsa-let-7b-5p	9653
hsa-let-7b-5p	3298
hsa-let-7b-5p	3320
hsa-let-7b-5p	3304
hsa-let-7b-5p	3312
hsa-let-7b-5p	3064
hsa-let-7b-5p	10075
hsa-let-7b-5p	55699
hsa-let-7b-5p	200205
hsa-let-7b-5p	3422
hsa-let-7b-5p	24138
hsa-let-7b-5p	3456
hsa-let-7b-5p	3475
hsa-let-7b-5p	10642
hsa-let-7b-5p	10644
hsa-let-7b-5p	10643
hsa-let-7b-5p	3508
hsa-let-7b-5p	3321
hsa-let-7b-5p	93185
hsa-let-7b-5p	84818
hsa-let-7b-5p	3614
hsa-let-7b-5p	3615
hsa-let-7b-5p	3636
hsa-let-7b-5p	26173
hsa-let-7b-5p	80789
hsa-let-7b-5p	25896
hsa-let-7b-5p	9807
hsa-let-7b-5p	26034
hsa-let-7b-5p	51194
hsa-let-7b-5p	79711
hsa-let-7b-5p	10527
hsa-let-7b-5p	10526
hsa-let-7b-5p	359948
hsa-let-7b-5p	8660
hsa-let-7b-5p	8471
hsa-let-7b-5p	79763
hsa-let-7b-5p	3693
hsa-let-7b-5p	182
hsa-let-7b-5p	3749
hsa-let-7b-5p	115207
hsa-let-7b-5p	10945
hsa-let-7b-5p	9682
hsa-let-7b-5p	8570
hsa-let-7b-5p	9812
hsa-let-7b-5p	23076
hsa-let-7b-5p	23078
hsa-let-7b-5p	57562
hsa-let-7b-5p	25962
hsa-let-7b-5p	57670
hsa-let-7b-5p	57691
hsa-let-7b-5p	57498
hsa-let-7b-5p	10749
hsa-let-7b-5p	3796
hsa-let-7b-5p	3833
hsa-let-7b-5p	55175
hsa-let-7b-5p	23633
hsa-let-7b-5p	79036
hsa-let-7b-5p	91133
hsa-let-7b-5p	246269
hsa-let-7b-5p	51110
hsa-let-7b-5p	23367
hsa-let-7b-5p	3930
hsa-let-7b-5p	3949
hsa-let-7b-5p	389421
hsa-let-7b-5p	84298
hsa-let-7b-5p	10960
hsa-let-7b-5p	10162
hsa-let-7b-5p	9926
hsa-let-7b-5p	23266
hsa-let-7b-5p	3936
hsa-let-7b-5p	4023
hsa-let-7b-5p	55631
hsa-let-7b-5p	10489
hsa-let-7b-5p	57470
hsa-let-7b-5p	56262
hsa-let-7b-5p	55341
hsa-let-7b-5p	11157
hsa-let-7b-5p	4048
hsa-let-7b-5p	4067
hsa-let-7b-5p	84328
hsa-let-7b-5p	4081
hsa-let-7b-5p	54682
hsa-let-7b-5p	5605
hsa-let-7b-5p	4134
hsa-let-7b-5p	9053
hsa-let-7b-5p	55700
hsa-let-7b-5p	5594
hsa-let-7b-5p	4141
hsa-let-7b-5p	92935
hsa-let-7b-5p	27430
hsa-let-7b-5p	114785
hsa-let-7b-5p	27349
hsa-let-7b-5p	4173
hsa-let-7b-5p	4176
hsa-let-7b-5p	4194
hsa-let-7b-5p	9969
hsa-let-7b-5p	9282
hsa-let-7b-5p	81857
hsa-let-7b-5p	80306
hsa-let-7b-5p	4208
hsa-let-7b-5p	59274
hsa-let-7b-5p	113655
hsa-let-7b-5p	57534
hsa-let-7b-5p	90007
hsa-let-7b-5p	84299
hsa-let-7b-5p	54531
hsa-let-7b-5p	54468
hsa-let-7b-5p	4285
hsa-let-7b-5p	23609
hsa-let-7b-5p	4298
hsa-let-7b-5p	25974
hsa-let-7b-5p	55233
hsa-let-7b-5p	92597
hsa-let-7b-5p	4343
hsa-let-7b-5p	4350
hsa-let-7b-5p	84954
hsa-let-7b-5p	79922
hsa-let-7b-5p	51253
hsa-let-7b-5p	57129
hsa-let-7b-5p	64963
hsa-let-7b-5p	51373
hsa-let-7b-5p	64951
hsa-let-7b-5p	51650
hsa-let-7b-5p	79684
hsa-let-7b-5p	4440
hsa-let-7b-5p	4478
hsa-let-7b-5p	51537
hsa-let-7b-5p	136319
hsa-let-7b-5p	4552
hsa-let-7b-5p	92154
hsa-let-7b-5p	57509
hsa-let-7b-5p	4609
hsa-let-7b-5p	26292
hsa-let-7b-5p	4641
hsa-let-7b-5p	4643
hsa-let-7b-5p	8260
hsa-let-7b-5p	80155
hsa-let-7b-5p	51126
hsa-let-7b-5p	79829
hsa-let-7b-5p	80218
hsa-let-7b-5p	79035
hsa-let-7b-5p	4666
hsa-let-7b-5p	10318
hsa-let-7b-5p	92345
hsa-let-7b-5p	79731
hsa-let-7b-5p	284565
hsa-let-7b-5p	9918
hsa-let-7b-5p	54892
hsa-let-7b-5p	57727
hsa-let-7b-5p	9611
hsa-let-7b-5p	4535
hsa-let-7b-5p	4536
hsa-let-7b-5p	4538
hsa-let-7b-5p	4539
hsa-let-7b-5p	4540
hsa-let-7b-5p	10397
hsa-let-7b-5p	4705
hsa-let-7b-5p	4734
hsa-let-7b-5p	91754
hsa-let-7b-5p	4772
hsa-let-7b-5p	4775
hsa-let-7b-5p	4792
hsa-let-7b-5p	9054
hsa-let-7b-5p	27247
hsa-let-7b-5p	57224
hsa-let-7b-5p	25836
hsa-let-7b-5p	54475
hsa-let-7b-5p	4833
hsa-let-7b-5p	10201
hsa-let-7b-5p	65083
hsa-let-7b-5p	9221
hsa-let-7b-5p	408050
hsa-let-7b-5p	8602
hsa-let-7b-5p	27020
hsa-let-7b-5p	7101
hsa-let-7b-5p	4893
hsa-let-7b-5p	4898
hsa-let-7b-5p	10412
hsa-let-7b-5p	54780
hsa-let-7b-5p	54888
hsa-let-7b-5p	64943
hsa-let-7b-5p	10101
hsa-let-7b-5p	64710
hsa-let-7b-5p	390916
hsa-let-7b-5p	9972
hsa-let-7b-5p	9631
hsa-let-7b-5p	8021
hsa-let-7b-5p	129401
hsa-let-7b-5p	51203
hsa-let-7b-5p	4931
hsa-let-7b-5p	64359
hsa-let-7b-5p	55916
hsa-let-7b-5p	100506658
hsa-let-7b-5p	5000
hsa-let-7b-5p	114884
hsa-let-7b-5p	28962
hsa-let-7b-5p	55611
hsa-let-7b-5p	5018
hsa-let-7b-5p	92106
hsa-let-7b-5p	55074
hsa-let-7b-5p	5036
hsa-let-7b-5p	80227
hsa-let-7b-5p	26986
hsa-let-7b-5p	5050
hsa-let-7b-5p	5058
hsa-let-7b-5p	27143
hsa-let-7b-5p	10914
hsa-let-7b-5p	9061
hsa-let-7b-5p	29780
hsa-let-7b-5p	5077
hsa-let-7b-5p	5094
hsa-let-7b-5p	5096
hsa-let-7b-5p	10336
hsa-let-7b-5p	5130
hsa-let-7b-5p	9468
hsa-let-7b-5p	5833
hsa-let-7b-5p	11235
hsa-let-7b-5p	22984
hsa-let-7b-5p	79031
hsa-let-7b-5p	201626
hsa-let-7b-5p	5156
hsa-let-7b-5p	8050
hsa-let-7b-5p	5163
hsa-let-7b-5p	57546
hsa-let-7b-5p	55066
hsa-let-7b-5p	23244
hsa-let-7b-5p	5187
hsa-let-7b-5p	8799
hsa-let-7b-5p	5190
hsa-let-7b-5p	5213
hsa-let-7b-5p	5216
hsa-let-7b-5p	5236
hsa-let-7b-5p	5238
hsa-let-7b-5p	10857
hsa-let-7b-5p	5255
hsa-let-7b-5p	54872
hsa-let-7b-5p	55011
hsa-let-7b-5p	5326
hsa-let-7b-5p	5331
hsa-let-7b-5p	5347
hsa-let-7b-5p	84898
hsa-let-7b-5p	23654
hsa-let-7b-5p	11243
hsa-let-7b-5p	5425
hsa-let-7b-5p	25885
hsa-let-7b-5p	84172
hsa-let-7b-5p	5430
hsa-let-7b-5p	5432
hsa-let-7b-5p	5437
hsa-let-7b-5p	5441
hsa-let-7b-5p	55703
hsa-let-7b-5p	10622
hsa-let-7b-5p	9883
hsa-let-7b-5p	100288540
hsa-let-7b-5p	100101267
hsa-let-7b-5p	10940
hsa-let-7b-5p	404785
hsa-let-7b-5p	10891
hsa-let-7b-5p	5481
hsa-let-7b-5p	5496
hsa-let-7b-5p	54776
hsa-let-7b-5p	26051
hsa-let-7b-5p	5510
hsa-let-7b-5p	5520
hsa-let-7b-5p	5529
hsa-let-7b-5p	23082
hsa-let-7b-5p	11230
hsa-let-7b-5p	639
hsa-let-7b-5p	11108
hsa-let-7b-5p	5557
hsa-let-7b-5p	5563
hsa-let-7b-5p	5576
hsa-let-7b-5p	5587
hsa-let-7b-5p	27339
hsa-let-7b-5p	10594
hsa-let-7b-5p	5631
hsa-let-7b-5p	84726
hsa-let-7b-5p	283659
hsa-let-7b-5p	23362
hsa-let-7b-5p	5715
hsa-let-7b-5p	10197
hsa-let-7b-5p	389362
hsa-let-7b-5p	26024
hsa-let-7b-5p	80142
hsa-let-7b-5p	5738
hsa-let-7b-5p	5743
hsa-let-7b-5p	8073
hsa-let-7b-5p	25930
hsa-let-7b-5p	9232
hsa-let-7b-5p	9698
hsa-let-7b-5p	80324
hsa-let-7b-5p	5817
hsa-let-7b-5p	7837
hsa-let-7b-5p	65263
hsa-let-7b-5p	2058
hsa-let-7b-5p	5859
hsa-let-7b-5p	9444
hsa-let-7b-5p	55278
hsa-let-7b-5p	10890
hsa-let-7b-5p	23682
hsa-let-7b-5p	25782
hsa-let-7b-5p	10743
hsa-let-7b-5p	5899
hsa-let-7b-5p	57148
hsa-let-7b-5p	26953
hsa-let-7b-5p	57826
hsa-let-7b-5p	5930
hsa-let-7b-5p	23543
hsa-let-7b-5p	10137
hsa-let-7b-5p	389677
hsa-let-7b-5p	9904
hsa-let-7b-5p	55696
hsa-let-7b-5p	23029
hsa-let-7b-5p	3516
hsa-let-7b-5p	1827
hsa-let-7b-5p	157506
hsa-let-7b-5p	5962
hsa-let-7b-5p	80346
hsa-let-7b-5p	85021
hsa-let-7b-5p	117584
hsa-let-7b-5p	388
hsa-let-7b-5p	391
hsa-let-7b-5p	55781
hsa-let-7b-5p	8780
hsa-let-7b-5p	338879
hsa-let-7b-5p	27246
hsa-let-7b-5p	9810
hsa-let-7b-5p	8731
hsa-let-7b-5p	55178
hsa-let-7b-5p	26015
hsa-let-7b-5p	22934
hsa-let-7b-5p	6136
hsa-let-7b-5p	6141
hsa-let-7b-5p	6142
hsa-let-7b-5p	10557
hsa-let-7b-5p	6229
hsa-let-7b-5p	6191
hsa-let-7b-5p	3921
hsa-let-7b-5p	6238
hsa-let-7b-5p	6241
hsa-let-7b-5p	27341
hsa-let-7b-5p	91695
hsa-let-7b-5p	23378
hsa-let-7b-5p	8634
hsa-let-7b-5p	6257
hsa-let-7b-5p	6294
hsa-let-7b-5p	6297
hsa-let-7b-5p	6309
hsa-let-7b-5p	57466
hsa-let-7b-5p	22828
hsa-let-7b-5p	9522
hsa-let-7b-5p	10067
hsa-let-7b-5p	6319
hsa-let-7b-5p	10389
hsa-let-7b-5p	9805
hsa-let-7b-5p	57410
hsa-let-7b-5p	6357
hsa-let-7b-5p	55153
hsa-let-7b-5p	23478
hsa-let-7b-5p	9919
hsa-let-7b-5p	10483
hsa-let-7b-5p	6407
hsa-let-7b-5p	26135
hsa-let-7b-5p	55209
hsa-let-7b-5p	23451
hsa-let-7b-5p	51460
hsa-let-7b-5p	51100
hsa-let-7b-5p	9644
hsa-let-7b-5p	10280
hsa-let-7b-5p	80143
hsa-let-7b-5p	6497
hsa-let-7b-5p	8273
hsa-let-7b-5p	6509
hsa-let-7b-5p	6576
hsa-let-7b-5p	8604
hsa-let-7b-5p	10165
hsa-let-7b-5p	60386
hsa-let-7b-5p	29957
hsa-let-7b-5p	81034
hsa-let-7b-5p	291
hsa-let-7b-5p	11001
hsa-let-7b-5p	7779
hsa-let-7b-5p	148867
hsa-let-7b-5p	222553
hsa-let-7b-5p	81539
hsa-let-7b-5p	54407
hsa-let-7b-5p	92745
hsa-let-7b-5p	9368
hsa-let-7b-5p	6594
hsa-let-7b-5p	6597
hsa-let-7b-5p	6598
hsa-let-7b-5p	6599
hsa-let-7b-5p	6601
hsa-let-7b-5p	6602
hsa-let-7b-5p	8243
hsa-let-7b-5p	23049
hsa-let-7b-5p	9887
hsa-let-7b-5p	8773
hsa-let-7b-5p	6626
hsa-let-7b-5p	6635
hsa-let-7b-5p	29934
hsa-let-7b-5p	6651
hsa-let-7b-5p	9580
hsa-let-7b-5p	6662
hsa-let-7b-5p	6667
hsa-let-7b-5p	6672
hsa-let-7b-5p	353324
hsa-let-7b-5p	60559
hsa-let-7b-5p	6693
hsa-let-7b-5p	6697
hsa-let-7b-5p	283377
hsa-let-7b-5p	6712
hsa-let-7b-5p	10847
hsa-let-7b-5p	6745
hsa-let-7b-5p	6767
hsa-let-7b-5p	55240
hsa-let-7b-5p	6786
hsa-let-7b-5p	10963
hsa-let-7b-5p	11329
hsa-let-7b-5p	6613
hsa-let-7b-5p	11198
hsa-let-7b-5p	55578
hsa-let-7b-5p	23345
hsa-let-7b-5p	23224
hsa-let-7b-5p	9144
hsa-let-7b-5p	26099
hsa-let-7b-5p	23118
hsa-let-7b-5p	6880
hsa-let-7b-5p	51616
hsa-let-7b-5p	54662
hsa-let-7b-5p	64786
hsa-let-7b-5p	128637
hsa-let-7b-5p	9238
hsa-let-7b-5p	6949
hsa-let-7b-5p	55714
hsa-let-7b-5p	54386
hsa-let-7b-5p	26136
hsa-let-7b-5p	7057
hsa-let-7b-5p	8563
hsa-let-7b-5p	7074
hsa-let-7b-5p	100287932
hsa-let-7b-5p	653252
hsa-let-7b-5p	92609
hsa-let-7b-5p	1678
hsa-let-7b-5p	26520
hsa-let-7b-5p	7082
hsa-let-7b-5p	7094
hsa-let-7b-5p	50999
hsa-let-7b-5p	11070
hsa-let-7b-5p	153339
hsa-let-7b-5p	23670
hsa-let-7b-5p	199953
hsa-let-7b-5p	55161
hsa-let-7b-5p	90809
hsa-let-7b-5p	55362
hsa-let-7b-5p	157378
hsa-let-7b-5p	160418
hsa-let-7b-5p	8742
hsa-let-7b-5p	3842
hsa-let-7b-5p	23112
hsa-let-7b-5p	114034
hsa-let-7b-5p	54863
hsa-let-7b-5p	27324
hsa-let-7b-5p	7162
hsa-let-7b-5p	7165
hsa-let-7b-5p	7171
hsa-let-7b-5p	7174
hsa-let-7b-5p	7178
hsa-let-7b-5p	80305
hsa-let-7b-5p	58485
hsa-let-7b-5p	8805
hsa-let-7b-5p	10155
hsa-let-7b-5p	9320
hsa-let-7b-5p	55621
hsa-let-7b-5p	51095
hsa-let-7b-5p	6738
hsa-let-7b-5p	26995
hsa-let-7b-5p	116461
hsa-let-7b-5p	10099
hsa-let-7b-5p	7263
hsa-let-7b-5p	283237
hsa-let-7b-5p	23170
hsa-let-7b-5p	10376
hsa-let-7b-5p	84790
hsa-let-7b-5p	203068
hsa-let-7b-5p	10844
hsa-let-7b-5p	10426
hsa-let-7b-5p	64852
hsa-let-7b-5p	200081
hsa-let-7b-5p	10907
hsa-let-7b-5p	7298
hsa-let-7b-5p	7317
hsa-let-7b-5p	9039
hsa-let-7b-5p	9898
hsa-let-7b-5p	7319
hsa-let-7b-5p	7322
hsa-let-7b-5p	7323
hsa-let-7b-5p	7329
hsa-let-7b-5p	9040
hsa-let-7b-5p	606551
hsa-let-7b-5p	55585
hsa-let-7b-5p	7993
hsa-let-7b-5p	83549
hsa-let-7b-5p	7371
hsa-let-7b-5p	7368
hsa-let-7b-5p	29128
hsa-let-7b-5p	10497
hsa-let-7b-5p	201294
hsa-let-7b-5p	8615
hsa-let-7b-5p	9100
hsa-let-7b-5p	9097
hsa-let-7b-5p	9958
hsa-let-7b-5p	23326
hsa-let-7b-5p	159195
hsa-let-7b-5p	84135
hsa-let-7b-5p	55813
hsa-let-7b-5p	7402
hsa-let-7b-5p	9341
hsa-let-7b-5p	51160
hsa-let-7b-5p	23339
hsa-let-7b-5p	27072
hsa-let-7b-5p	10352
hsa-let-7b-5p	8936
hsa-let-7b-5p	8976
hsa-let-7b-5p	51729
hsa-let-7b-5p	81554
hsa-let-7b-5p	79446
hsa-let-7b-5p	80232
hsa-let-7b-5p	10885
hsa-let-7b-5p	55339
hsa-let-7b-5p	10785
hsa-let-7b-5p	9277
hsa-let-7b-5p	54853
hsa-let-7b-5p	54663
hsa-let-7b-5p	84128
hsa-let-7b-5p	65125
hsa-let-7b-5p	57510
hsa-let-7b-5p	23039
hsa-let-7b-5p	54464
hsa-let-7b-5p	64132
hsa-let-7b-5p	10413
hsa-let-7b-5p	55689
hsa-let-7b-5p	25844
hsa-let-7b-5p	56252
hsa-let-7b-5p	91746
hsa-let-7b-5p	7531
hsa-let-7b-5p	7534
hsa-let-7b-5p	284273
hsa-let-7b-5p	9877
hsa-let-7b-5p	56829
hsa-let-7b-5p	23318
hsa-let-7b-5p	84240
hsa-let-7b-5p	10444
hsa-let-7b-5p	79776
hsa-let-7b-5p	7750
hsa-let-7b-5p	64397
hsa-let-7b-5p	7707
hsa-let-7b-5p	7756
hsa-let-7b-5p	7551
hsa-let-7b-5p	57693
hsa-let-7b-5p	79088
hsa-let-7b-5p	22847
hsa-let-7b-5p	51545
hsa-let-7b-5p	80095
hsa-let-7b-5p	23361
hsa-let-7b-5p	22834
hsa-let-7b-5p	57592
hsa-let-7b-5p	390980
hsa-let-7b-5p	284371
hsa-let-7c-5p	60
hsa-let-7c-5p	81
hsa-let-7c-5p	91
hsa-let-7c-5p	26523
hsa-let-7c-5p	64853
hsa-let-7c-5p	26057
hsa-let-7c-5p	23204
hsa-let-7c-5p	25852
hsa-let-7c-5p	488
hsa-let-7c-5p	4508
hsa-let-7c-5p	9031
hsa-let-7c-5p	598
hsa-let-7c-5p	54880
hsa-let-7c-5p	2186
hsa-let-7c-5p	6046
hsa-let-7c-5p	55108
hsa-let-7c-5p	134553
hsa-let-7c-5p	55071
hsa-let-7c-5p	57685
hsa-let-7c-5p	59283
hsa-let-7c-5p	867
hsa-let-7c-5p	23466
hsa-let-7c-5p	9133
hsa-let-7c-5p	892
hsa-let-7c-5p	899
hsa-let-7c-5p	900
hsa-let-7c-5p	8476
hsa-let-7c-5p	283638
hsa-let-7c-5p	1105
hsa-let-7c-5p	4166
hsa-let-7c-5p	4849
hsa-let-7c-5p	8533
hsa-let-7c-5p	10980
hsa-let-7c-5p	10920
hsa-let-7c-5p	4512
hsa-let-7c-5p	4513
hsa-let-7c-5p	4514
hsa-let-7c-5p	1457
hsa-let-7c-5p	23283
hsa-let-7c-5p	10238
hsa-let-7c-5p	84516
hsa-let-7c-5p	8886
hsa-let-7c-5p	1660
hsa-let-7c-5p	23405
hsa-let-7c-5p	23341
hsa-let-7c-5p	9829
hsa-let-7c-5p	84444
hsa-let-7c-5p	1849
hsa-let-7c-5p	8661
hsa-let-7c-5p	8663
hsa-let-7c-5p	2130
hsa-let-7c-5p	2140
hsa-let-7c-5p	83640
hsa-let-7c-5p	55215
hsa-let-7c-5p	60681
hsa-let-7c-5p	2317
hsa-let-7c-5p	2309
hsa-let-7c-5p	84750
hsa-let-7c-5p	8325
hsa-let-7c-5p	2617
hsa-let-7c-5p	57459
hsa-let-7c-5p	26003
hsa-let-7c-5p	2873
hsa-let-7c-5p	2931
hsa-let-7c-5p	2975
hsa-let-7c-5p	8091
hsa-let-7c-5p	10075
hsa-let-7c-5p	9807
hsa-let-7c-5p	10527
hsa-let-7c-5p	359948
hsa-let-7c-5p	8515
hsa-let-7c-5p	3720
hsa-let-7c-5p	9812
hsa-let-7c-5p	23095
hsa-let-7c-5p	337882
hsa-let-7c-5p	55004
hsa-let-7c-5p	3939
hsa-let-7c-5p	3950
hsa-let-7c-5p	4048
hsa-let-7c-5p	8720
hsa-let-7c-5p	4208
hsa-let-7c-5p	59274
hsa-let-7c-5p	10988
hsa-let-7c-5p	84190
hsa-let-7c-5p	23608
hsa-let-7c-5p	4352
hsa-let-7c-5p	4609
hsa-let-7c-5p	4649
hsa-let-7c-5p	4535
hsa-let-7c-5p	4536
hsa-let-7c-5p	4538
hsa-let-7c-5p	4539
hsa-let-7c-5p	4540
hsa-let-7c-5p	4833
hsa-let-7c-5p	4853
hsa-let-7c-5p	4884
hsa-let-7c-5p	4893
hsa-let-7c-5p	11051
hsa-let-7c-5p	9818
hsa-let-7c-5p	10298
hsa-let-7c-5p	51585
hsa-let-7c-5p	10336
hsa-let-7c-5p	5190
hsa-let-7c-5p	692312
hsa-let-7c-5p	5529
hsa-let-7c-5p	11230
hsa-let-7c-5p	10594
hsa-let-7c-5p	7916
hsa-let-7c-5p	5690
hsa-let-7c-5p	56984
hsa-let-7c-5p	80142
hsa-let-7c-5p	5747
hsa-let-7c-5p	8073
hsa-let-7c-5p	9444
hsa-let-7c-5p	22864
hsa-let-7c-5p	10890
hsa-let-7c-5p	83871
hsa-let-7c-5p	5869
hsa-let-7c-5p	57186
hsa-let-7c-5p	51195
hsa-let-7c-5p	55159
hsa-let-7c-5p	6142
hsa-let-7c-5p	6122
hsa-let-7c-5p	6207
hsa-let-7c-5p	6229
hsa-let-7c-5p	6192
hsa-let-7c-5p	6262
hsa-let-7c-5p	6294
hsa-let-7c-5p	51119
hsa-let-7c-5p	10262
hsa-let-7c-5p	152503
hsa-let-7c-5p	23411
hsa-let-7c-5p	8273
hsa-let-7c-5p	6558
hsa-let-7c-5p	6576
hsa-let-7c-5p	113829
hsa-let-7c-5p	9748
hsa-let-7c-5p	6599
hsa-let-7c-5p	6602
hsa-let-7c-5p	10073
hsa-let-7c-5p	22938
hsa-let-7c-5p	10847
hsa-let-7c-5p	11198
hsa-let-7c-5p	6877
hsa-let-7c-5p	27097
hsa-let-7c-5p	6901
hsa-let-7c-5p	7046
hsa-let-7c-5p	55858
hsa-let-7c-5p	25829
hsa-let-7c-5p	131405
hsa-let-7c-5p	8295
hsa-let-7c-5p	64852
hsa-let-7c-5p	7311
hsa-let-7c-5p	81556
hsa-let-7c-5p	51729
hsa-let-7c-5p	10885
hsa-let-7c-5p	80349
hsa-let-7c-5p	116115
hsa-let-7c-5p	51545
hsa-let-7c-5p	80110
hsa-let-7d-5p	1603
hsa-let-7d-5p	23405
hsa-let-7d-5p	1982
hsa-let-7d-5p	9910
hsa-let-7d-5p	54498
hsa-let-7d-5p	29777
hsa-let-7d-5p	115
hsa-let-7d-5p	10270
hsa-let-7d-5p	351
hsa-let-7d-5p	1820
hsa-let-7d-5p	91947
hsa-let-7d-5p	55909
hsa-let-7d-5p	9184
hsa-let-7d-5p	55216
hsa-let-7d-5p	57102
hsa-let-7d-5p	138199
hsa-let-7d-5p	59283
hsa-let-7d-5p	10241
hsa-let-7d-5p	84869
hsa-let-7d-5p	153241
hsa-let-7d-5p	25792
hsa-let-7d-5p	8904
hsa-let-7d-5p	9150
hsa-let-7d-5p	90957
hsa-let-7d-5p	10395
hsa-let-7d-5p	8655
hsa-let-7d-5p	1825
hsa-let-7d-5p	23085
hsa-let-7d-5p	9700
hsa-let-7d-5p	84923
hsa-let-7d-5p	57579
hsa-let-7d-5p	100132916
hsa-let-7d-5p	26273
hsa-let-7d-5p	11146
hsa-let-7d-5p	51026
hsa-let-7d-5p	7107
hsa-let-7d-5p	81491
hsa-let-7d-5p	3014
hsa-let-7d-5p	9421
hsa-let-7d-5p	8091
hsa-let-7d-5p	9456
hsa-let-7d-5p	57722
hsa-let-7d-5p	3480
hsa-let-7d-5p	10642
hsa-let-7d-5p	10643
hsa-let-7d-5p	3596
hsa-let-7d-5p	3670
hsa-let-7d-5p	84056
hsa-let-7d-5p	57148
hsa-let-7d-5p	4297
hsa-let-7d-5p	3841
hsa-let-7d-5p	23185
hsa-let-7d-5p	3930
hsa-let-7d-5p	389421
hsa-let-7d-5p	91750
hsa-let-7d-5p	115353
hsa-let-7d-5p	92312
hsa-let-7d-5p	4352
hsa-let-7d-5p	51258
hsa-let-7d-5p	51126
hsa-let-7d-5p	8648
hsa-let-7d-5p	387921
hsa-let-7d-5p	3164
hsa-let-7d-5p	9480
hsa-let-7d-5p	94104
hsa-let-7d-5p	10336
hsa-let-7d-5p	57092
hsa-let-7d-5p	5154
hsa-let-7d-5p	5433
hsa-let-7d-5p	54458
hsa-let-7d-5p	5883
hsa-let-7d-5p	10137
hsa-let-7d-5p	5993
hsa-let-7d-5p	6160
hsa-let-7d-5p	6194
hsa-let-7d-5p	27079
hsa-let-7d-5p	205564
hsa-let-7d-5p	140890
hsa-let-7d-5p	84068
hsa-let-7d-5p	4891
hsa-let-7d-5p	6574
hsa-let-7d-5p	55676
hsa-let-7d-5p	113829
hsa-let-7d-5p	56916
hsa-let-7d-5p	54471
hsa-let-7d-5p	9825
hsa-let-7d-5p	283377
hsa-let-7d-5p	285672
hsa-let-7d-5p	83931
hsa-let-7d-5p	23061
hsa-let-7d-5p	7046
hsa-let-7d-5p	7057
hsa-let-7d-5p	7091
hsa-let-7d-5p	222068
hsa-let-7d-5p	65084
hsa-let-7d-5p	23306
hsa-let-7d-5p	23670
hsa-let-7d-5p	160418
hsa-let-7d-5p	27327
hsa-let-7d-5p	9804
hsa-let-7d-5p	7165
hsa-let-7d-5p	7263
hsa-let-7d-5p	23358
hsa-let-7d-5p	55813
hsa-let-7d-5p	9841
hsa-let-7d-5p	9880
hsa-let-7d-5p	7752
hsa-let-7d-5p	140883
hsa-let-7d-5p	117608
hsa-let-7d-5p	116115
hsa-let-7d-5p	84146
hsa-let-7d-5p	155061
hsa-let-7d-5p	284390
hsa-let-7e-3p	10980
hsa-let-7e-3p	10920
hsa-let-7e-3p	1446
hsa-let-7e-3p	2873
hsa-let-7e-3p	79142
hsa-let-7e-5p	1603
hsa-let-7e-5p	8091
hsa-let-7e-5p	9910
hsa-let-7e-5p	8243
hsa-let-7e-5p	7471
hsa-let-7e-5p	54708
hsa-let-7e-5p	121536
hsa-let-7e-5p	79814
hsa-let-7e-5p	26523
hsa-let-7e-5p	27161
hsa-let-7e-5p	79868
hsa-let-7e-5p	271
hsa-let-7e-5p	91369
hsa-let-7e-5p	26060
hsa-let-7e-5p	372
hsa-let-7e-5p	84986
hsa-let-7e-5p	8289
hsa-let-7e-5p	9915
hsa-let-7e-5p	4508
hsa-let-7e-5p	11273
hsa-let-7e-5p	57597
hsa-let-7e-5p	9031
hsa-let-7e-5p	55589
hsa-let-7e-5p	25798
hsa-let-7e-5p	55108
hsa-let-7e-5p	8945
hsa-let-7e-5p	100131378
hsa-let-7e-5p	79794
hsa-let-7e-5p	84798
hsa-let-7e-5p	11238
hsa-let-7e-5p	91768
hsa-let-7e-5p	10498
hsa-let-7e-5p	23468
hsa-let-7e-5p	29903
hsa-let-7e-5p	29070
hsa-let-7e-5p	90324
hsa-let-7e-5p	900
hsa-let-7e-5p	25819
hsa-let-7e-5p	988
hsa-let-7e-5p	83461
hsa-let-7e-5p	1016
hsa-let-7e-5p	54901
hsa-let-7e-5p	10659
hsa-let-7e-5p	401541
hsa-let-7e-5p	55636
hsa-let-7e-5p	80205
hsa-let-7e-5p	1364
hsa-let-7e-5p	1213
hsa-let-7e-5p	7555
hsa-let-7e-5p	1291
hsa-let-7e-5p	22820
hsa-let-7e-5p	4512
hsa-let-7e-5p	1352
hsa-let-7e-5p	84987
hsa-let-7e-5p	51241
hsa-let-7e-5p	4514
hsa-let-7e-5p	1387
hsa-let-7e-5p	1398
hsa-let-7e-5p	80169
hsa-let-7e-5p	5476
hsa-let-7e-5p	51503
hsa-let-7e-5p	1555
hsa-let-7e-5p	23002
hsa-let-7e-5p	55827
hsa-let-7e-5p	50717
hsa-let-7e-5p	131566
hsa-let-7e-5p	54487
hsa-let-7e-5p	1665
hsa-let-7e-5p	90957
hsa-let-7e-5p	1729
hsa-let-7e-5p	1832
hsa-let-7e-5p	1838
hsa-let-7e-5p	8445
hsa-let-7e-5p	22873
hsa-let-7e-5p	8669
hsa-let-7e-5p	1973
hsa-let-7e-5p	1979
hsa-let-7e-5p	91748
hsa-let-7e-5p	2020
hsa-let-7e-5p	2029
hsa-let-7e-5p	57700
hsa-let-7e-5p	57184
hsa-let-7e-5p	2224
hsa-let-7e-5p	653404
hsa-let-7e-5p	2752
hsa-let-7e-5p	8833
hsa-let-7e-5p	2787
hsa-let-7e-5p	2824
hsa-let-7e-5p	2969
hsa-let-7e-5p	2975
hsa-let-7e-5p	29083
hsa-let-7e-5p	55662
hsa-let-7e-5p	204851
hsa-let-7e-5p	440689
hsa-let-7e-5p	3107
hsa-let-7e-5p	3146
hsa-let-7e-5p	3183
hsa-let-7e-5p	11100
hsa-let-7e-5p	90161
hsa-let-7e-5p	3480
hsa-let-7e-5p	10643
hsa-let-7e-5p	126298
hsa-let-7e-5p	8660
hsa-let-7e-5p	8471
hsa-let-7e-5p	3712
hsa-let-7e-5p	221895
hsa-let-7e-5p	221037
hsa-let-7e-5p	84056
hsa-let-7e-5p	10300
hsa-let-7e-5p	9703
hsa-let-7e-5p	9710
hsa-let-7e-5p	55634
hsa-let-7e-5p	10184
hsa-let-7e-5p	89782
hsa-let-7e-5p	4000
hsa-let-7e-5p	10489
hsa-let-7e-5p	56262
hsa-let-7e-5p	51599
hsa-let-7e-5p	7798
hsa-let-7e-5p	23499
hsa-let-7e-5p	9782
hsa-let-7e-5p	23389
hsa-let-7e-5p	4288
hsa-let-7e-5p	4352
hsa-let-7e-5p	51116
hsa-let-7e-5p	341116
hsa-let-7e-5p	6307
hsa-let-7e-5p	23788
hsa-let-7e-5p	9650
hsa-let-7e-5p	64419
hsa-let-7e-5p	4613
hsa-let-7e-5p	4650
hsa-let-7e-5p	79903
hsa-let-7e-5p	4686
hsa-let-7e-5p	57701
hsa-let-7e-5p	51517
hsa-let-7e-5p	56926
hsa-let-7e-5p	4535
hsa-let-7e-5p	4536
hsa-let-7e-5p	4537
hsa-let-7e-5p	4538
hsa-let-7e-5p	4540
hsa-let-7e-5p	3340
hsa-let-7e-5p	4696
hsa-let-7e-5p	4725
hsa-let-7e-5p	4763
hsa-let-7e-5p	84276
hsa-let-7e-5p	4833
hsa-let-7e-5p	9221
hsa-let-7e-5p	80023
hsa-let-7e-5p	64943
hsa-let-7e-5p	55270
hsa-let-7e-5p	254552
hsa-let-7e-5p	9631
hsa-let-7e-5p	100506658
hsa-let-7e-5p	162998
hsa-let-7e-5p	55611
hsa-let-7e-5p	55593
hsa-let-7e-5p	5036
hsa-let-7e-5p	23241
hsa-let-7e-5p	167153
hsa-let-7e-5p	5077
hsa-let-7e-5p	5094
hsa-let-7e-5p	22984
hsa-let-7e-5p	57546
hsa-let-7e-5p	23481
hsa-let-7e-5p	5188
hsa-let-7e-5p	5198
hsa-let-7e-5p	5226
hsa-let-7e-5p	23469
hsa-let-7e-5p	5255
hsa-let-7e-5p	23556
hsa-let-7e-5p	51227
hsa-let-7e-5p	94005
hsa-let-7e-5p	55344
hsa-let-7e-5p	23203
hsa-let-7e-5p	5424
hsa-let-7e-5p	661
hsa-let-7e-5p	9360
hsa-let-7e-5p	5514
hsa-let-7e-5p	5504
hsa-let-7e-5p	5518
hsa-let-7e-5p	400736
hsa-let-7e-5p	10594
hsa-let-7e-5p	7916
hsa-let-7e-5p	23362
hsa-let-7e-5p	5687
hsa-let-7e-5p	5708
hsa-let-7e-5p	23198
hsa-let-7e-5p	5747
hsa-let-7e-5p	5831
hsa-let-7e-5p	5768
hsa-let-7e-5p	55684
hsa-let-7e-5p	29127
hsa-let-7e-5p	10742
hsa-let-7e-5p	5903
hsa-let-7e-5p	5906
hsa-let-7e-5p	5928
hsa-let-7e-5p	10432
hsa-let-7e-5p	5936
hsa-let-7e-5p	9939
hsa-let-7e-5p	55758
hsa-let-7e-5p	5962
hsa-let-7e-5p	57414
hsa-let-7e-5p	64795
hsa-let-7e-5p	79102
hsa-let-7e-5p	8731
hsa-let-7e-5p	6117
hsa-let-7e-5p	6134
hsa-let-7e-5p	6136
hsa-let-7e-5p	6157
hsa-let-7e-5p	6181
hsa-let-7e-5p	6185
hsa-let-7e-5p	23248
hsa-let-7e-5p	6232
hsa-let-7e-5p	3921
hsa-let-7e-5p	64121
hsa-let-7e-5p	26156
hsa-let-7e-5p	862
hsa-let-7e-5p	6299
hsa-let-7e-5p	6319
hsa-let-7e-5p	22955
hsa-let-7e-5p	57410
hsa-let-7e-5p	11196
hsa-let-7e-5p	10509
hsa-let-7e-5p	26135
hsa-let-7e-5p	10169
hsa-let-7e-5p	9739
hsa-let-7e-5p	27352
hsa-let-7e-5p	50944
hsa-let-7e-5p	348235
hsa-let-7e-5p	6499
hsa-let-7e-5p	6560
hsa-let-7e-5p	66035
hsa-let-7e-5p	54407
hsa-let-7e-5p	28232
hsa-let-7e-5p	28231
hsa-let-7e-5p	64744
hsa-let-7e-5p	9043
hsa-let-7e-5p	221178
hsa-let-7e-5p	9789
hsa-let-7e-5p	60559
hsa-let-7e-5p	6693
hsa-let-7e-5p	6711
hsa-let-7e-5p	6713
hsa-let-7e-5p	6720
hsa-let-7e-5p	6427
hsa-let-7e-5p	6741
hsa-let-7e-5p	8027
hsa-let-7e-5p	56910
hsa-let-7e-5p	6774
hsa-let-7e-5p	10923
hsa-let-7e-5p	10147
hsa-let-7e-5p	6827
hsa-let-7e-5p	23512
hsa-let-7e-5p	6840
hsa-let-7e-5p	6925
hsa-let-7e-5p	23424
hsa-let-7e-5p	7013
hsa-let-7e-5p	63892
hsa-let-7e-5p	92609
hsa-let-7e-5p	7078
hsa-let-7e-5p	84314
hsa-let-7e-5p	7126
hsa-let-7e-5p	7132
hsa-let-7e-5p	7442
hsa-let-7e-5p	8295
hsa-let-7e-5p	23170
hsa-let-7e-5p	10376
hsa-let-7e-5p	10383
hsa-let-7e-5p	7296
hsa-let-7e-5p	9898
hsa-let-7e-5p	7328
hsa-let-7e-5p	7336
hsa-let-7e-5p	254048
hsa-let-7e-5p	56886
hsa-let-7e-5p	54887
hsa-let-7e-5p	131669
hsa-let-7e-5p	55850
hsa-let-7e-5p	57695
hsa-let-7e-5p	84135
hsa-let-7e-5p	6844
hsa-let-7e-5p	7407
hsa-let-7e-5p	9686
hsa-let-7e-5p	55187
hsa-let-7e-5p	81554
hsa-let-7e-5p	23001
hsa-let-7e-5p	10785
hsa-let-7e-5p	57599
hsa-let-7e-5p	93594
hsa-let-7e-5p	331
hsa-let-7e-5p	7531
hsa-let-7e-5p	7532
hsa-let-7e-5p	10971
hsa-let-7e-5p	7763
hsa-let-7e-5p	124961
hsa-let-7e-5p	643836
hsa-let-7e-5p	55888
hsa-let-7e-5p	7776
hsa-let-7e-5p	10172
hsa-let-7e-5p	342909
hsa-let-7e-5p	26036
hsa-let-7e-5p	22834
hsa-let-7e-5p	54989
hsa-let-7e-5p	390980
hsa-let-7f-1-3p	4670
hsa-let-7f-1-3p	51102
hsa-let-7f-2-3p	51260
hsa-let-7f-2-3p	5366
hsa-let-7f-5p	445
hsa-let-7f-5p	1917
hsa-let-7f-5p	11082
hsa-let-7f-5p	2224
hsa-let-7f-5p	547
hsa-let-7f-5p	5655
hsa-let-7f-5p	5653
hsa-let-7f-5p	4922
hsa-let-7f-5p	7031
hsa-let-7f-5p	7431
hsa-let-7f-5p	501
hsa-let-7f-5p	23520
hsa-let-7f-5p	10620
hsa-let-7f-5p	23204
hsa-let-7f-5p	25852
hsa-let-7f-5p	10973
hsa-let-7f-5p	28990
hsa-let-7f-5p	51062
hsa-let-7f-5p	488
hsa-let-7f-5p	506
hsa-let-7f-5p	545
hsa-let-7f-5p	11273
hsa-let-7f-5p	9031
hsa-let-7f-5p	54880
hsa-let-7f-5p	65981
hsa-let-7f-5p	9133
hsa-let-7f-5p	595
hsa-let-7f-5p	900
hsa-let-7f-5p	1026
hsa-let-7f-5p	283638
hsa-let-7f-5p	255919
hsa-let-7f-5p	9337
hsa-let-7f-5p	10980
hsa-let-7f-5p	10920
hsa-let-7f-5p	1446
hsa-let-7f-5p	1588
hsa-let-7f-5p	1783
hsa-let-7f-5p	1896
hsa-let-7f-5p	8663
hsa-let-7f-5p	8729
hsa-let-7f-5p	2752
hsa-let-7f-5p	2873
hsa-let-7f-5p	2960
hsa-let-7f-5p	8091
hsa-let-7f-5p	3181
hsa-let-7f-5p	11100
hsa-let-7f-5p	10642
hsa-let-7f-5p	3596
hsa-let-7f-5p	23367
hsa-let-7f-5p	121227
hsa-let-7f-5p	4209
hsa-let-7f-5p	4352
hsa-let-7f-5p	10943
hsa-let-7f-5p	92154
hsa-let-7f-5p	4609
hsa-let-7f-5p	4677
hsa-let-7f-5p	4538
hsa-let-7f-5p	4540
hsa-let-7f-5p	6528
hsa-let-7f-5p	7080
hsa-let-7f-5p	11163
hsa-let-7f-5p	639
hsa-let-7f-5p	9135
hsa-let-7f-5p	4920
hsa-let-7f-5p	9733
hsa-let-7f-5p	10291
hsa-let-7f-5p	8604
hsa-let-7f-5p	9197
hsa-let-7f-5p	6599
hsa-let-7f-5p	6631
hsa-let-7f-5p	6667
hsa-let-7f-5p	51332
hsa-let-7f-5p	23118
hsa-let-7f-5p	6924
hsa-let-7f-5p	7038
hsa-let-7f-5p	8563
hsa-let-7f-5p	10099
hsa-let-7f-5p	55833
hsa-let-7f-5p	9898
hsa-let-7f-5p	9099
hsa-let-7f-5p	85015
hsa-let-7f-5p	51067
hsa-let-7f-5p	10971
hsa-let-7f-5p	124245
hsa-let-7f-5p	140883
hsa-let-7g-3p	3008
hsa-let-7g-3p	9500
hsa-let-7g-5p	1603
hsa-let-7g-5p	1982
hsa-let-7g-5p	8091
hsa-let-7g-5p	10642
hsa-let-7g-5p	26523
hsa-let-7g-5p	11215
hsa-let-7g-5p	598
hsa-let-7g-5p	648
hsa-let-7g-5p	23774
hsa-let-7g-5p	1029
hsa-let-7g-5p	1278
hsa-let-7g-5p	50717
hsa-let-7g-5p	1915
hsa-let-7g-5p	3146
hsa-let-7g-5p	3596
hsa-let-7g-5p	3845
hsa-let-7g-5p	4214
hsa-let-7g-5p	5243
hsa-let-7g-5p	4609
hsa-let-7g-5p	23011
hsa-let-7g-5p	5903
hsa-let-7g-5p	6136
[truncated: 35,661 more rows]
