# Supplementary material for: Integration of Multiple Genomic and Phenotype Data to Infer Novel miRNA-Disease Associations
Source: PLoS One. 2016 Feb 5;11(2):e0148521. doi: 10.1371/journal.pone.0148521 (PMC4743935; doi:10.1371/journal.pone.0148521)
Supplement: S3 File — (XLS) [file pone.0148521.s005.xls]

## Sheet: Sheet1
The DPN constructed using 5-NN network
MIM ID	MIM ID	Similarity score
100050	114300	0.545931
100050	119500	0.554385
100050	305400	0.64296
100050	601353	0.532557
100050	606851	0.52288
100070	122455	0.470701
100070	144250	0.431258
100070	208000	0.440279
100070	601367	0.444208
100070	608318	0.530694
100100	134780	0.397453
100100	185120	0.432163
100100	248340	0.462195
100100	268310	0.39487
100100	601389	0.395166
100200	134100	0.525776
100200	136480	0.388676
100200	164100	0.60786
100200	178330	0.640204
100200	258400	0.526694
100200	601536	0.460177
100200	607034	0.600998
100300	106260	0.535987
100300	225000	0.526616
100300	225060	0.518507
100300	256520	0.538186
100300	264480	0.519538
100600	191482	0.452805
100600	234030	0.428128
100600	257960	0.431632
100600	601345	0.416919
100600	602511	0.387678
100600	608600	0.478147
100675	204800	0.54495
100675	206400	0.604391
100675	237450	0.603672
100675	237550	0.549549
100675	276500	0.54495
100675	308600	0.506977
100700	129600	0.575868
100700	169300	0.634288
100700	192200	0.570486
100700	236660	0.547145
100700	248760	0.50969
100700	248770	0.552961
100700	249300	0.570048
100800	160900	0.427719
100800	177170	0.460627
100800	309900	0.428589
100800	601803	0.412371
100800	607014	0.42594
100820	121800	0.463692
100820	137130	0.311006
100820	138070	0.428694
100820	217500	0.463528
100820	217520	0.484829
100820	219750	0.421037
100820	300494	0.476599
100820	300497	0.476599
101000	131445	0.482566
101000	162091	0.564345
101000	162210	0.476472
101000	162260	0.543199
101000	168000	0.438847
101000	256700	0.461842
101000	607174	0.605199
101120	123150	0.612071
101120	174700	0.622644
101120	176700	0.601657
101120	180750	0.657244
101120	186200	0.636699
101120	218090	0.619803
101200	101600	0.580955
101200	101800	0.551508
101200	117550	0.499179
101200	123500	0.5115
101200	123790	0.562781
101200	200990	0.575736
101200	207410	0.498279
101200	218600	0.535235
101200	235730	0.595664
101200	268400	0.515302
101200	300373	0.495983
101200	303600	0.507069
101200	305450	0.612435
101200	305600	0.551111
101200	601803	0.590866
101400	101600	0.604536
101400	123500	0.536303
101400	148820	0.551962
101400	157900	0.541054
101400	180750	0.653522
101400	201050	0.595635
101400	206920	0.601202
101400	218600	0.540788
101400	233500	0.576932
101400	239800	0.666328
101400	249420	0.552992
101400	271960	0.484864
101400	272440	0.583476
101400	600920	0.567983
101400	602249	0.594236
101400	607872	0.500208
101400	608572	0.610247
101600	101200	0.580955
101600	101400	0.604536
101600	123500	0.707827
101600	123790	0.600397
101600	135100	0.473222
101600	180750	0.574339
101800	101200	0.551508
101800	119600	0.517493
101800	150250	0.568529
101800	166250	0.558989
101800	166350	0.441429
101800	190351	0.528875
101800	210600	0.531104
101800	216400	0.507423
101800	269500	0.513801
101800	277590	0.539039
101800	311300	0.563725
101805	172880	0.466262
101805	263750	0.465995
101805	277990	0.499342
101805	601349	0.49738
101805	606851	0.472924
101840	101850	0.745928
101840	133200	0.533962
101840	148520	0.568166
101840	244850	0.570991
101840	278150	0.588395
101850	101840	0.745928
101850	101900	0.490331
101850	145200	0.503955
101850	148520	0.638134
101850	148700	0.591421
101850	244850	0.661472
101850	602036	0.608331
101900	101850	0.490331
101900	148520	0.479001
101900	148600	0.456851
101900	169600	0.450908
101900	175860	0.489465
101900	175900	0.489351
102000	103400	0.645805
102000	151620	0.433181
102000	158100	0.872429
102000	189000	0.872429
102000	189100	0.872429
102000	189200	0.775776
102000	189230	0.872638
102000	265140	0.430682
102100	119000	0.623592
102100	125600	0.561467
102100	129200	0.598179
102100	136500	0.544345
102100	164900	0.486973
102100	182200	0.472515
102100	268850	0.58849
102100	601341	0.372654
102150	109900	0.57224
102150	119900	0.280416
102150	210745	0.473132
102150	300360	0.473089
102150	602249	0.502432
102150	603572	0.550115
102200	104600	0.504561
102200	144800	0.360235
102200	160980	0.400284
102200	171420	0.368975
102200	174800	0.381938
102200	219080	0.376803
102300	158100	0.404343
102300	189000	0.404343
102300	189100	0.404343
102300	272620	0.42786
102300	608831	0.619111
102350	121350	0.456081
102350	122580	0.625061
102350	177100	0.55873
102350	181300	0.622678
102350	260660	0.420517
102350	310095	0.486773
102370	112910	0.552714
102370	113100	0.543342
102370	118610	0.474119
102370	185600	0.538638
102370	192700	0.374477
102370	211800	0.358762
102370	221800	0.444717
102370	309630	0.535381
102370	605838	0.433158
102370	606835	0.613549
102400	109500	0.398523
102400	112600	0.686484
102400	112800	0.583064
102400	113200	0.599227
102400	167100	0.436474
102400	186200	0.60978
102400	259610	0.506495
102400	602585	0.594587
102490	120330	0.444014
102490	120400	0.566625
102490	185750	0.527412
102490	257850	0.475909
102490	274205	0.507301
102490	607323	0.55814
102500	135900	0.516736
102500	180700	0.515146
102500	182212	0.528195
102500	305620	0.515675
102500	600330	0.548641
102510	112500	0.668107
102510	113200	0.711665
102510	126050	0.636548
102510	173800	0.481567
102510	174100	0.53293
102510	174200	0.701765
102510	174400	0.710398
102510	183802	0.533449
102510	186300	0.747045
102510	200700	0.523229
102510	277300	0.494853
102510	300233	0.533175
102510	605967	0.788533
102510	607132	0.583745
102520	113470	0.473836
102520	124100	0.329751
102520	163850	0.429577
102520	174100	0.486499
102520	193000	0.568573
102520	225290	0.494725
102520	314550	0.479145
102520	602085	0.530678
102520	603194	0.436629
102520	604380	0.580651
102530	243060	0.453071
102530	258150	0.553429
102530	309120	0.43235
102530	415000	0.391896
102530	605339	0.395412
102650	106995	0.69214
102650	143050	0.589077
102650	155500	0.536132
102650	174400	0.754817
102650	174700	0.737399
102650	175690	0.759613
102650	185650	0.586142
102650	185700	0.627321
102650	185750	0.687687
102650	186550	0.568706
102650	226110	0.536939
102650	226985	0.491109
102650	300233	0.601523
102650	600095	0.603819
102650	605289	0.7018
102650	607324	0.742171
102650	607539	0.772845
102660	114480	0.404414
102660	151020	0.428019
102660	155720	0.467314
102660	156240	0.349813
102660	157860	0.428019
102660	259500	0.67203
102700	202700	0.458449
102700	265120	0.389514
102700	300400	0.524327
102700	301000	0.502232
102700	308240	0.444341
102700	601457	0.493499
102700	601859	0.443103
102700	603554	0.465139
102800	134700	0.44982
102800	141700	0.644998
102800	147540	0.371073
102800	166900	0.575928
102800	166910	0.582793
102800	172150	0.721781
102800	185010	0.592746
102800	205700	0.54603
102800	225450	0.96944
102800	230450	0.508015
102800	231900	0.626412
102800	270970	0.658024
102800	600461	0.455771
102800	601608	0.391719
102800	607279	0.733326
102900	133100	0.53862
102900	137280	0.397958
102900	182170	0.568398
102900	194320	0.647734
102900	206300	0.58943
102900	222800	0.645608
102900	230430	0.519324
102900	230450	0.568395
102900	231900	0.739746
102900	243080	0.450115
102900	258920	0.522868
102900	266120	0.56961
102900	603528	0.401124
103050	239510	0.55043
103050	240600	0.547589
103050	272300	0.453515
103050	273770	0.518127
103050	300352	0.53817
103050	601161	0.459442
103050	601378	0.418629
103050	606056	0.50342
103050	608643	0.408075
103050	608688	0.506225
103100	129750	0.454067
103100	156600	0.43529
103100	159420	0.447405
103100	165000	0.513413
103100	178800	0.487202
103200	145981	0.343186
103200	151900	0.322313
103200	257500	0.516154
103200	300306	0.511761
103200	309490	0.4273
103200	603188	0.420804
103200	603670	0.396056
103200	607514	0.512969
103230	136150	0.517786
103230	155800	0.600001
103230	202200	0.477247
103230	242890	0.517301
103230	248260	0.517301
103230	300250	0.604275
103285	129510	0.604782
103285	146530	0.533796
103285	181270	0.570945
103285	218330	0.460657
103285	275450	0.534543
103285	605203	0.477214
103285	605289	0.546848
103300	141400	0.507662
103300	201050	0.496629
103300	202650	0.497964
103300	277720	0.495843
103300	602483	0.548863
103400	102000	0.645805
103400	158100	0.553837
103400	189000	0.553837
103400	189100	0.553837
103400	189230	0.552494
103420	149700	0.422817
103420	168800	0.465178
103420	180920	0.468943
103420	257980	0.517267
103420	601549	0.572419
103420	601553	0.450178
103470	103500	0.661768
103470	126070	0.642518
103470	193510	0.580941
103470	203100	0.501531
103470	203310	0.640595
103470	278400	0.659479
103470	300600	0.608646
103470	300650	0.79182
103470	300700	0.71624
103500	103470	0.661768
103500	126070	0.770745
103500	172800	0.50235
103500	193500	0.535639
103500	193510	0.627003
103500	220900	0.806318
103500	227010	0.800465
103500	300650	0.799563
103500	300700	0.740355
103500	600501	0.629706
103580	146200	0.49756
103580	166350	0.393691
103580	241410	0.473033
103580	262190	0.380076
103580	262500	0.413585
103580	264700	0.460884
103580	277440	0.469906
103580	309000	0.445364
103581	203330	0.550731
103581	264010	0.486842
103581	601491	0.506568
103581	603233	0.465044
103581	605746	0.528079
103780	144650	0.395846
103780	277730	0.482023
103780	600084	0.362773
103780	606581	0.498687
103780	607834	0.417619
103800	252700	0.421623
103800	252930	0.401702
103800	252940	0.417559
103800	253200	0.411218
103800	253230	0.405476
103900	112410	0.538868
103900	201400	0.525839
103900	605115	0.457997
103900	605635	0.465528
103900	608622	0.419839
103920	145300	0.401914
103920	208600	0.425888
103920	605844	0.341498
103920	606257	0.425888
103920	607277	0.425612
104000	104110	0.507257
104000	190340	0.391243
104000	203655	0.459645
104000	601217	0.44265
104000	601941	0.430928
104100	104110	0.647102
104100	104130	0.50356
104100	125595	0.707107
104100	146520	0.647108
104100	151600	0.341352
104100	158000	0.674486
104100	161050	0.51014
104100	164800	0.566401
104100	177750	0.809911
104100	210210	0.499514
104100	211390	0.577873
104100	212360	0.541011
104100	227090	0.428855
104100	252200	0.809911
104100	601705	0.590031
104100	602032	0.567832
104110	104000	0.507257
104110	104100	0.647102
104110	125595	0.504733
104110	139650	0.511495
104110	177750	0.70959
104110	203655	0.624235
104110	210210	0.42098
104110	252200	0.70959
104110	300042	0.594164
104130	104100	0.50356
104130	167200	0.443652
104130	177750	0.459828
104130	203600	0.576456
104130	203650	0.506104
104130	211390	0.493302
104130	249400	0.433702
104130	608526	0.323264
104200	141200	0.51619
104200	153640	0.51371
104200	161900	0.562658
104200	203780	0.499531
104200	221200	0.534527
104290	119915	0.484012
104290	141500	0.495757
104290	167870	0.295524
104290	206570	0.407164
104290	231630	0.526657
104290	602066	0.510507
104290	602481	0.631065
104290	607516	0.513582
104290	608762	0.50435
104300	105150	0.383554
104300	143100	0.459762
104300	172700	0.414016
104300	190685	0.434492
104300	221770	0.405485
104300	600274	0.428725
104300	605055	0.419075
104310	105500	0.531263
104310	172700	0.575088
104310	176600	0.468137
104310	181500	0.460104
104310	260540	0.577782
104310	605055	0.642964
104310	606688	0.559363
104310	606889	0.667457
104310	608907	0.635851
104350	180700	0.553968
104350	182210	0.466847
104350	183802	0.540197
104350	201000	0.577054
104350	233500	0.545272
104350	600383	0.48147
104350	600736	0.598213
104350	600908	0.547214
104400	143050	0.537681
104400	228200	0.49695
104400	258200	0.467459
104400	266910	0.458461
104400	601360	0.609743
104400	602085	0.567989
104500	104510	0.617144
104500	104530	0.650707
104500	114120	0.629013
104500	125500	0.653165
104500	130900	0.826484
104500	204650	0.763884
104500	204700	0.810694
104500	226750	0.625311
104500	234580	0.545597
104500	248350	0.39609
104500	301200	0.763857
104500	301201	0.464002
104500	608563	0.786748
104510	104500	0.617144
104510	130900	0.636608
104510	190320	0.574316
104510	204650	0.622215
104510	234580	0.553527
104510	272700	0.549955
104510	301100	0.583488
104510	301200	0.634955
104510	601216	0.687094
104530	104500	0.650707
104530	104570	0.602642
104530	125300	0.634627
104530	125420	0.588823
104530	130900	0.708257
104530	204650	0.836763
104530	301200	0.667154
104530	301201	0.593142
104570	104530	0.602642
104570	125640	0.623969
104570	161000	0.606966
104570	204650	0.62331
104570	206600	0.562672
104600	102200	0.504561
104600	144800	0.430662
104600	230300	0.452424
104600	262710	0.378999
104600	264300	0.418793
105120	123540	0.360473
105120	134100	0.407942
105120	134200	0.364574
105120	155900	0.39406
105120	204870	0.392231
105150	104300	0.383554
105150	105210	0.380242
105150	174050	0.38998
105150	254800	0.363679
105150	601367	0.389386
105200	120100	0.4573
105200	161900	0.448257
105200	191900	0.480171
105200	249100	0.418852
105200	254500	0.409632
105210	105150	0.380242
105210	108500	0.481818
105210	125310	0.438544
105210	141500	0.465102
105210	172500	0.418386
105210	192315	0.398195
105210	206570	0.403641
105210	600072	0.467401
105210	602481	0.452246
105210	607459	0.445113
105250	114030	0.456451
105250	155240	0.533914
105250	162260	0.432339
105250	165670	0.33374
105250	171420	0.46389
105250	211410	0.447515
105250	600634	0.416399
105300	182800	0.57988
105300	191650	0.307458
105300	191800	0.537895
105300	246555	0.652609
105300	300143	0.480152
105300	309560	0.483469
105400	105500	0.461169
105400	158700	0.49603
105400	182980	0.474669
105400	272800	0.453876
105400	600274	0.458024
105400	606353	0.427166
105500	104310	0.531263
105500	105400	0.461169
105500	105550	0.58921
105500	127750	0.508222
105500	168610	0.543523
105500	600274	0.512156
105550	105500	0.58921
105550	117300	0.498417
105550	172700	0.557261
105550	205200	0.501729
105550	221770	0.453067
105550	605055	0.674994
105550	606353	0.444072
105550	606688	0.55176
105550	606889	0.511217
105563	105565	0.496308
105563	176780	0.432654
105563	207620	0.353996
105563	301800	0.350497
105563	600145	0.507898
105565	105563	0.496308
105565	209770	0.41679
105565	603918	0.432798
105565	604329	0.428525
105565	607329	0.431853
105570	151020	0.512875
105570	157860	0.512875
105570	272370	0.418159
105570	312210	0.452901
105570	603206	0.600645
105580	131445	0.434255
105580	194090	0.450382
105580	268210	0.558727
105580	605982	0.439244
105580	607174	0.472832
105600	140700	0.44944
105600	142470	0.477438
105600	205950	0.440876
105600	219750	0.484464
105600	224100	0.595137
105600	224120	0.610565
105600	301300	0.462585
105600	305435	0.482026
105600	603902	0.421516
105650	205600	0.400655
105650	205900	0.395991
105650	224120	0.405744
105650	276822	0.406105
105650	606129	0.433969
105800	132900	0.375583
105800	173900	0.386817
105800	174050	0.472339
105800	601367	0.497606
105800	608542	0.699539
105805	108800	0.601615
105805	140500	0.580235
105805	212135	0.625722
105805	241550	0.534543
105805	246570	0.604897
105805	277200	0.532343
105805	607087	0.41745
105830	123450	0.441637
105830	176270	0.523459
105830	182290	0.461239
105830	190685	0.464049
105830	212065	0.470374
105830	215100	0.46824
105830	309400	0.461476
105830	309900	0.471337
105830	312750	0.476846
105830	601491	0.386353
105835	132400	0.592517
105835	140600	0.610819
105835	142669	0.596429
105835	170700	0.572137
105835	182260	0.62233
105835	271600	0.610286
105835	313400	0.50347
106050	163100	0.408913
106050	177350	0.441684
106050	234810	0.439501
106050	277175	0.375324
106050	305800	0.439881
106050	602089	0.405849
106070	116860	0.445203
106070	163000	0.494346
106070	300232	0.385257
106070	605627	0.382281
106070	608279	0.386432
106100	120790	0.406607
106100	212070	0.40402
106100	230800	0.417297
106100	300268	0.431971
106100	300400	0.396486
106200	106210	0.553544
106200	137357	0.579506
106200	194072	0.554559
106200	206750	0.727023
106200	603807	0.809612
106210	106200	0.553544
106210	194072	0.447839
106210	206750	0.497379
106210	310600	0.492841
106210	603807	0.494818
106220	106230	0.765493
106220	115660	0.563034
106220	123570	0.536464
106220	142730	0.461632
106220	156190	0.541624
106220	156700	0.605559
106230	106220	0.765493
106230	115660	0.738289
106230	116100	0.705113
106230	129750	0.52798
106230	136520	0.591706
106230	156190	0.566134
106230	239900	0.706637
106230	245450	0.494654
106230	315000	0.706637
106230	603807	0.530965
106240	143000	0.4084
106240	159410	0.564069
106240	159420	0.611127
106240	165000	0.577462
106240	165098	0.513526
106240	185070	0.410177
106240	607034	0.510004
106250	119300	0.695944
106250	119580	0.664706
106250	179400	0.766722
106250	600990	0.699932
106250	601420	0.561209
106250	606713	0.767797
106250	608874	0.684593
106260	100300	0.535987
106260	129400	0.736188
106260	129900	0.644799
106260	147770	0.473094
106260	153400	0.480131
106260	209885	0.501354
106260	225000	0.733577
106260	225060	0.709597
106260	233500	0.595271
106260	275210	0.556979
106260	604292	0.657029
106280	108320	0.610081
106280	118330	0.432327
106280	120500	0.733014
106280	126190	0.404654
106280	127600	0.510627
106280	136400	0.703834
106280	137400	0.528917
106280	149700	0.460153
106280	151630	0.77553
106280	151640	0.696116
106280	161100	0.419717
106280	164330	0.471765
106280	168800	0.487223
106280	169610	0.503183
106280	171450	0.636532
106280	181010	0.559466
106280	181030	0.362931
106280	189300	0.682222
106280	192100	0.664874
106280	229045	0.34923
106280	258800	0.495191
106280	270460	0.518196
106280	275250	0.597213
106300	109650	0.371143
106300	150600	0.448601
106300	180300	0.388109
106300	191390	0.407155
106300	200400	0.365312
106300	266600	0.383453
106300	605225	0.462751
106400	148520	0.548399
106400	148600	0.49596
106400	244850	0.558739
106400	600231	0.595011
106400	602036	0.464755
106500	125530	0.524453
106500	132990	0.431867
106500	133000	0.813723
106500	177350	0.578356
106500	193050	0.570369
106500	227000	0.505663
106500	602036	0.716926
106500	602068	0.345372
106500	604855	0.39023
106500	608579	0.372041
106600	600990	0.62684
106600	602966	0.652754
106600	604547	0.65118
106600	604625	0.696181
106600	608874	0.652478
106700	108800	0.366983
106700	178400	0.356814
106700	208530	0.366108
106700	234810	0.420183
106700	606642	0.429583
106700	607411	0.457408
106750	145100	0.517501
106750	155200	0.698077
106750	155800	0.691345
106750	167900	0.465166
106750	179500	0.492733
106750	179850	0.519574
106900	106990	0.567989
106900	129810	0.696549
106900	129830	0.857001
106900	161050	0.519246
106900	249710	0.714064
106900	301815	0.711235
106900	602077	0.632039
106900	602966	0.709771
106900	603543	0.628427
106900	608874	0.70941
106990	106900	0.567989
106990	125640	0.575791
106990	207700	0.600219
106990	207731	0.510074
106990	601345	0.523806
106995	102650	0.69214
106995	112600	0.685001
106995	112900	0.805251
106995	112910	0.715409
106995	161600	0.444362
106995	174100	0.54175
106995	185700	0.593611
106995	190680	0.784586
106995	206800	0.684096
106995	226110	0.565855
106995	228900	0.54355
106995	276821	0.516504
106995	606895	0.535847
107000	109000	0.699023
107000	135800	0.515479
107000	142700	0.496045
107000	147900	0.512904
107000	168860	0.550808
107000	188200	0.650941
107000	244510	0.458809
107100	141200	0.49314
107100	176450	0.377861
107100	182690	0.462707
107100	256120	0.533549
107100	301800	0.693278
107100	600101	0.579314
107100	605321	0.438262
107200	113480	0.572715
107200	147950	0.474958
107200	227200	0.618672
107200	244200	0.599043
107200	275600	0.442352
107200	301700	0.714137
107250	115800	0.635971
107250	116100	0.6361
107250	116800	0.638905
107250	121390	0.741501
107250	217700	0.526262
107250	219150	0.450796
107250	302300	0.636383
107250	309700	0.553759
107300	176860	0.459561
107300	188050	0.452314
107300	188055	0.451057
107300	228960	0.505069
107300	600880	0.410669
107320	152700	0.402396
107320	182410	0.453865
107320	234000	0.373859
107320	605218	0.416385
107320	608437	0.403159
107320	608805	0.362197
107480	164210	0.526295
107480	192350	0.569497
107480	200990	0.5597
107480	218600	0.5493
107480	243800	0.544997
107480	301800	0.490721
107480	600123	0.546727
107480	601446	0.504517
107500	603802	0.493224
107500	604317	0.608364
107500	604321	0.60859
107500	608393	0.608364
107500	608716	0.524318
107550	120300	0.636051
107550	163050	0.534937
107550	163100	0.409138
107550	163200	0.448811
107550	165630	0.492047
107550	194300	0.536305
107550	216820	0.636185
107550	604622	0.406217
107600	113700	0.475042
107600	207700	0.497511
107600	225280	0.472016
107600	311280	0.484645
107600	602249	0.456005
107601	109730	0.532875
107601	125640	0.500856
107601	182250	0.410301
107601	211800	0.342648
107601	314400	0.501388
107601	600309	0.401948
107601	601345	0.495656
107601	604381	0.57489
107640	107650	0.442324
107640	137763	0.529906
107640	207720	0.474084
107640	258660	0.37965
107640	272120	0.512369
107650	107640	0.442324
107650	137763	0.468212
107650	234100	0.380497
107650	258660	0.519209
107650	605526	0.377584
107700	202550	0.293345
107700	223400	0.330379
107700	224230	0.295419
107700	604519	0.30318
107700	608448	0.351673
107800	108725	0.488393
107800	136120	0.482405
107800	144010	0.510203
107800	152600	0.45014
107800	270900	0.475521
107850	112440	0.650666
107850	119650	0.515547
107850	136540	0.915003
107850	137000	0.776623
107850	157200	0.530242
107850	179850	0.47642
107850	191440	0.560427
107850	608032	0.726906
107900	115400	0.582823
107900	137360	0.461159
107900	191400	0.582771
107900	191440	0.709473
107900	207770	0.473566
107900	223610	0.612414
107900	241600	0.452119
107900	249600	0.511979
107900	601849	0.542439
107900	605946	0.605154
107950	188470	0.389954
107950	188550	0.474279
107950	300488	0.318195
107950	603737	0.415209
107950	607464	0.437912
107950	607893	0.569537
107970	192605	0.486575
107970	601494	0.454816
107970	602087	0.581845
107970	604169	0.447369
107970	608758	0.454941
108000	112910	0.488983
108000	167600	0.472932
108000	187390	0.466034
108000	188100	0.455171
108000	190410	0.532773
108000	602200	0.432774
108010	116860	0.446509
108010	140850	0.443088
108010	601101	0.398909
108010	608354	0.439267
108010	608355	0.569308
108050	109650	0.378051
108050	186580	0.533516
108050	187360	0.392204
108050	208250	0.487326
108050	270200	0.35978
108100	134750	0.452354
108100	135800	0.494916
108100	140600	0.624468
108100	142730	0.55269
108100	182260	0.600627
108100	183840	0.577833
108100	184300	0.436815
108100	208158	0.441142
108100	600668	0.529269
108100	604416	0.455712
108110	108120	0.63719
108110	108140	0.533113
108110	108145	0.530777
108110	114300	0.547276
108110	259780	0.444388
108110	277590	0.535639
108110	314300	0.375866
108120	108110	0.63719
108120	108130	0.633941
108120	108140	0.636704
108120	108145	0.568354
108120	113450	0.502615
108120	193700	0.551092
108120	259780	0.452888
108120	603546	0.604321
108130	108120	0.633941
108130	108140	0.758065
108130	219200	0.474028
108130	226900	0.549707
108130	277990	0.55102
108130	600325	0.517957
108130	603546	0.570852
108140	108110	0.533113
108140	108120	0.636704
108140	108130	0.758065
108140	121070	0.623593
108140	123853	0.435811
108140	158300	0.539575
108140	193700	0.605158
108140	210550	0.455426
108140	219200	0.453737
108140	277720	0.670993
108140	313420	0.517749
108140	601680	0.524939
108145	108110	0.530777
108145	108120	0.568354
108145	166700	0.445711
108145	186500	0.597138
108145	248370	0.486075
108145	258850	0.54028
108145	259050	0.5528
108145	259780	0.462961
108145	300232	0.54453
108145	601559	0.419713
108145	601668	0.503168
108145	607561	0.537929
108200	162370	0.487329
108200	211965	0.524568
108200	221650	0.717167
108200	224800	0.533285
108200	300158	0.551402
108200	304590	0.717549
108200	601868	0.672565
108200	602092	0.669446
108200	608641	0.683207
108200	608837	0.472805
108300	143200	0.616052
108300	154780	0.59558
108300	156550	0.554323
108300	184840	0.609339
108300	215150	0.579149
108300	268050	0.485455
108300	277600	0.495369
108300	604841	0.676118
108300	608328	0.527685
108320	106280	0.610081
108320	129100	0.785243
108320	137400	0.557816
108320	161100	0.588823
108320	165150	0.572062
108320	189300	0.814249
108320	257270	0.504878
108320	275250	0.99968
108320	606840	0.490268
108340	146850	0.54588
108340	151020	0.703283
108340	154020	0.4375
108340	157860	0.703283
108340	300179	0.571904
108340	312210	0.62522
108340	601400	0.476079
108340	606445	0.505539
108390	204800	0.649288
108390	237450	0.444386
108390	276200	0.463069
108390	276500	0.649288
108390	605019	0.370843
108390	605850	0.576936
108450	164000	0.468473
108450	172870	0.537436
108450	184460	0.467411
108450	210400	0.456254
108450	246000	0.476101
108450	309620	0.440184
108500	105210	0.481818
108500	141500	0.535079
108500	206570	0.400416
108500	601042	0.56805
108500	602481	0.59461
108500	604432	0.551494
108500	606552	0.578901
108500	606554	0.648965
108600	137440	0.483144
108600	182820	0.457739
108600	270550	0.56598
108600	302500	0.554654
108600	604360	0.61422
108600	606721	0.439874
108600	607259	0.572373
108600	607565	0.550756
108650	133190	0.555655
108650	206700	0.577263
108650	270500	0.506463
108650	271320	0.46859
108650	301310	0.536426
108650	604326	0.600209
108650	605259	0.637486
108650	605361	0.587967
108650	608687	0.590036
108650	608768	0.610291
108700	130950	0.454152
108700	176250	0.439134
108700	209100	0.582948
108700	256851	0.460506
108700	302600	0.484554
108700	607694	0.458321
108720	114290	0.536378
108720	127300	0.456814
108720	150250	0.562472
108720	224400	0.573989
108720	224410	0.592617
108720	258315	0.537262
108720	258480	0.638261
108720	269250	0.572647
108721	218090	0.577346
108721	222600	0.566923
108721	226900	0.612646
108721	245160	0.471993
108721	245600	0.591728
108721	256050	0.665534
108721	264180	0.460348
108721	266280	0.567592
108721	268305	0.594151
108721	300280	0.535617
108725	107800	0.488393
108725	144250	0.631383
108725	227500	0.395936
108725	238400	0.444845
108725	604499	0.833813
108725	605201	0.60556
108725	608318	0.657628
108725	608320	0.645893
108725	608446	0.746066
108725	608901	0.734617
108760	124700	0.560038
108760	128980	0.606335
108760	166760	0.461303
108760	221300	0.596279
108760	275230	0.560572
108760	608814	0.653628
108770	209600	0.389107
108770	212110	0.624132
108770	226100	0.333632
108770	604145	0.555807
108770	604765	0.514153
108770	605582	0.626955
108770	607487	0.626649
108800	105805	0.601615
108800	106700	0.366983
108800	108900	0.659676
108800	178650	0.541558
108800	300442	0.647179
108800	601322	0.45698
108800	605067	0.641027
108800	607941	0.615033
108900	108800	0.659676
108900	113301	0.656618
108900	178650	0.590657
108900	212090	0.698659
108900	224700	0.466895
108900	255960	0.364776
108900	271950	0.436079
108900	277200	0.633419
108900	300442	0.542344
108900	601322	0.573138
108900	603595	0.472918
108900	607941	0.771267
108900	608281	0.438082
108950	194200	0.39951
108950	604169	0.293557
108950	607554	0.30333
108950	608583	0.333349
108950	608988	0.49898
108985	116600	0.571593
108985	180210	0.449567
108985	600790	0.490735
108985	608051	0.468795
108985	608908	0.487684
109000	107000	0.699023
109000	135800	0.502394
109000	142700	0.45981
109000	147900	0.482284
109000	186550	0.461225
109000	314570	0.459441
109050	157900	0.511974
109050	183700	0.565019
109050	185750	0.6644
109050	186350	0.636863
109050	251255	0.615453
109050	601222	0.667628
109050	601379	0.574188
109050	602849	0.647273
109100	187360	0.49079
109100	240300	0.401478
109100	266600	0.402591
109100	269200	0.399645
109100	608392	0.379238
109120	126800	0.489147
109120	157900	0.490059
109120	217990	0.450653
109120	218000	0.490279
109120	222448	0.454236
109120	601088	0.493421
109120	602849	0.513231
109130	134600	0.536578
109130	166450	0.535809
109130	179800	0.550005
109130	241520	0.518065
109130	241530	0.618217
109130	259730	0.450629
109150	143100	0.472156
109150	164400	0.722805
109150	164500	0.593023
109150	183086	0.615194
109150	183090	0.742485
109150	312920	0.509043
109160	114650	0.458916
109160	181200	0.55244
109160	220150	0.4423
109160	264110	0.59807
109160	314900	0.587587
109160	601676	0.512342
109200	131200	0.454798
109200	166950	0.385094
109200	177750	0.575671
109200	184700	0.475547
109200	241090	0.808186
109200	252200	0.575671
109200	260910	0.554508
109200	608115	0.501765
109200	608509	0.447335
109300	127800	0.584573
109300	182255	0.519843
109300	186850	0.652466
109300	215050	0.489404
109300	301940	0.475448
109350	133239	0.433336
109350	142400	0.323111
109350	148500	0.380231
109350	175020	0.371961
109350	600263	0.430743
109390	132800	0.483614
109390	146530	0.581714
109390	166970	0.501495
109390	182000	0.613973
109390	273120	0.498361
109390	301845	0.669819
109390	604451	0.607708
109390	605462	0.625272
109400	180200	0.478722
109400	211750	0.480256
109400	261540	0.46651
109400	311200	0.473511
109400	312870	0.483649
109500	102400	0.398523
109500	158300	0.384773
109500	186700	0.484692
109500	272480	0.500088
109500	309645	0.420972
109543	151400	0.396785
109543	151440	0.424775
109543	151441	0.49113
109543	159558	0.637785
109543	308960	0.50609
109560	146850	0.471787
109560	151020	0.469236
109560	157860	0.469236
109560	243080	0.456121
109560	601083	0.43332
109560	608957	0.46065
109650	106300	0.371143
109650	108050	0.378051
109650	142730	0.38331
109650	186580	0.366514
109650	607665	0.349131
109650	608068	0.48005
109720	181750	0.349782
109720	184900	0.375145
109720	217070	0.350879
109720	235555	0.342071
109720	602347	0.363212
109730	107601	0.532875
109730	132900	0.457395
109730	314400	0.537584
109730	604381	0.539008
109730	608967	0.453305
109740	145400	0.540094
109740	163955	0.489266
109740	164000	0.741844
109740	164745	0.541431
109740	194000	0.580741
109740	210400	0.749912
109740	251240	0.473198
109740	607812	0.559595
109740	608811	0.561334
109800	179760	0.561459
109800	179770	0.560695
109800	194090	0.604021
109800	603956	0.528759
109800	605982	0.538967
109820	123700	0.362497
109820	147900	0.368793
109820	223320	0.498205
109820	275300	0.525827
109820	305200	0.409147
109900	102150	0.57224
109900	227330	0.58058
109900	272950	0.573448
109900	600736	0.628616
109900	605130	0.539725
109900	608156	0.572602
110000	131450	0.857473
110000	131460	0.869525
110000	131500	0.735242
110000	145100	0.751076
110000	145590	0.483604
110000	150900	0.835578
110000	165600	0.565127
110000	186600	0.547785
110000	260900	0.364256
110000	264810	0.618344
110000	600598	0.603452
110000	603119	0.546063
110050	314250	0.466468
110050	600193	0.499439
110050	602124	0.445162
110050	602629	0.44979
110050	607671	0.465939
110100	219000	0.494339
110100	248700	0.505564
110100	268650	0.428701
110100	311360	0.442723
110100	312830	0.508568
110100	605627	0.501133
110100	607500	0.536016
110150	116150	0.525793
110150	185450	0.716296
110150	225200	0.509491
110150	255500	0.54233
110150	608908	0.589535
110720	111360	0.588539
110720	111500	1
110720	111800	1
110720	125570	0.726628
110720	147710	0.403334
110720	180950	0.610736
110720	194320	0.584252
110720	206200	0.571869
110720	217050	0.528945
110720	247420	1
110720	600166	0.550187
110720	604329	0.717805
110720	606642	0.536761
110720	608251	0.511587
110800	115665	0.638385
110800	115700	0.549812
110800	600881	0.549791
110800	601202	0.549803
110800	601286	0.549773
111360	110720	0.588539
111360	111500	0.588539
111360	111800	0.588539
111360	114650	0.564009
111360	247420	0.588539
111360	307830	0.513807
111360	314900	0.726513
111400	266120	0.419143
111400	278300	0.403159
111400	312210	0.369695
111400	603806	0.375461
111400	607676	0.364982
111500	110720	1
111500	111360	0.588539
111500	111800	1
111500	125570	0.726628
111500	147710	0.403334
111500	180950	0.610736
111500	217050	0.528945
111500	247420	1
111500	600166	0.550187
111500	604329	0.717805
111500	606642	0.536761
111500	608251	0.511587
111600	118865	0.428877
111600	177700	0.719821
111600	192800	0.515576
111600	227220	0.749083
111600	258660	0.435109
111600	259750	0.587437
111600	268040	0.423987
111600	277350	0.458328
111600	304000	0.719821
111600	314380	0.719821
111600	601813	0.719821
111800	110720	1
111800	111360	0.588539
111800	111500	1
111800	125570	0.726628
111800	147710	0.403334
111800	180950	0.610736
111800	217050	0.528945
111800	247420	1
111800	600166	0.550187
111800	604329	0.717805
111800	606642	0.536761
111800	608251	0.511587
112200	115645	0.382378
112200	140900	0.448417
112200	193900	0.359361
112200	600195	0.432943
112200	600376	0.366853
112240	122900	0.472634
112240	148800	0.543077
112240	155980	0.479096
112240	259440	0.468716
112240	604922	0.471857
112250	117600	0.465722
112250	166260	0.357428
112250	200710	0.340489
112250	265880	0.373759
112250	603656	0.345854
112270	134610	0.462348
112270	172150	0.44222
112270	177050	0.43459
112270	186575	0.480116
112270	231095	0.428386
112300	129490	0.586348
112300	133200	0.58259
112300	167200	0.463728
112300	167210	0.441019
112300	183500	0.641751
112300	257980	0.5829
112300	605779	0.597319
112300	607656	0.605228
112310	200600	0.505032
112310	224410	0.477885
112310	258480	0.472329
112310	271665	0.461043
112310	309645	0.467174
112350	146000	0.431282
112350	146300	0.430983
112350	166740	0.421642
112350	193100	0.460305
112350	242530	0.425345
112370	251255	0.514907
112370	604317	0.635951
112370	604321	0.635601
112370	608393	0.635951
112370	608716	0.548562
112410	103900	0.538868
112410	145500	0.424558
112410	601367	0.41541
112410	603918	0.561637
112410	604329	0.545972
112410	605714	0.385327
112410	607329	0.561551
112410	608622	0.62552
112410	608902	0.428905
112430	114200	0.60507
112430	151200	0.58755
112430	165700	0.577634
112430	185650	0.572302
112430	187390	0.655078
112430	188100	0.652217
112430	190410	0.861174
112430	190500	0.735917
112430	268250	0.540989
112430	274200	0.735545
112430	300378	0.501723
112430	600356	0.489709
112440	107850	0.650666
112440	125580	0.696719
112440	136100	0.654812
112440	137370	0.490838
112440	139800	0.847367
112440	139900	0.39726
112440	157600	0.618755
112440	167600	0.435918
112440	186750	0.660107
112440	273600	0.505829
112440	309200	0.44444
112440	309630	0.748353
112440	603096	0.412328
112440	603670	0.400212
112450	112500	0.6879
112450	112600	0.696883
112450	113200	0.815381
112450	139750	0.627673
112450	140000	0.504743
112450	188201	0.679939
112450	190680	0.690823
112450	211369	0.584618
112450	228900	0.5538
112450	264010	0.593716
112450	272620	0.553096
112450	301940	0.762723
112450	600430	0.515923
112500	102510	0.668107
112500	112450	0.6879
112500	113200	0.79897
112500	113300	0.582344
112500	139750	0.582056
112500	174600	0.714938
112500	184460	0.595021
112500	185650	0.589364
112500	185700	0.690464
112500	250215	0.574832
112500	259610	0.526205
112500	264010	0.604866
112500	277300	0.444382
112500	600002	0.628578
112500	603396	0.654538
112600	102400	0.686484
112600	106995	0.685001
112600	112450	0.696883
112600	112800	0.856865
112600	112910	0.796565
112600	113100	0.622348
112600	113310	0.585575
112600	113475	0.662435
112600	119100	0.530413
112600	161600	0.464481
112600	185600	0.73209
112600	207620	0.495696
112600	223610	0.625983
112600	227270	0.520953
112600	228250	0.521385
112600	228900	0.564399
112600	259100	0.570535
112600	259270	0.784449
112600	272150	0.8494
112600	272620	0.590946
112600	301940	0.672924
112600	606895	0.559606
112700	114200	0.697994
112700	125580	0.652044
112700	126050	0.591015
112700	136100	0.655336
112700	165700	0.693603
112700	167100	0.414747
112700	186750	0.655259
112700	228800	0.475208
112700	259100	0.612848
112700	264010	0.608828
112700	269630	0.620732
112800	102400	0.583064
112800	112600	0.856865
112800	113475	0.770242
112800	151620	0.458399
112800	158100	0.771569
112800	160300	0.576252
112800	189000	0.771569
112800	190680	0.80649
112800	203340	0.584747
112800	219070	0.731107
112800	225300	0.665693
112800	259270	0.640749
112800	265140	0.465376
112800	272150	0.850593
112800	309630	0.664087
112800	602342	0.604984
112900	106995	0.805251
112900	125590	0.796156
112900	152600	0.60763
112900	164800	0.593088
112900	188100	0.712884
112900	190500	0.804713
112900	190680	0.797102
112900	226110	0.494382
112900	274190	0.409864
112900	274200	0.80512
112900	603530	0.42658
112910	102370	0.552714
112910	106995	0.715409
112910	108000	0.488983
112910	112600	0.796565
112910	113310	0.634759
112910	115400	0.508726
112910	137370	0.533267
112910	139800	0.660322
112910	145200	0.47321
112910	157600	0.533515
112910	161600	0.499319
112910	206550	0.468053
112910	207620	0.527098
112910	225300	0.655365
112910	259100	0.567982
112910	259270	0.620305
112910	309630	0.68285
112910	602535	0.398903
112910	603096	0.377268
112910	606835	0.593539
113000	120400	0.712034
113000	149730	0.498024
113000	184460	0.612063
113000	185750	0.683266
113000	264475	0.610661
113000	602471	0.476393
113000	605289	0.597847
113100	102370	0.543342
113100	112600	0.622348
113100	174600	0.607101
113100	174700	0.601136
113100	186350	0.6261
113100	200700	0.548845
113100	272150	0.582185
113100	601356	0.520398
113200	102400	0.599227
113200	102510	0.711665
113200	112450	0.815381
113200	112500	0.79897
113200	113300	0.592194
113200	123150	0.699862
113200	173800	0.451921
113200	176240	0.629934
113200	186300	0.69585
113200	211369	0.605045
113200	255980	0.492711
113200	277300	0.470057
113200	600002	0.590588
113200	603396	0.687309
113200	607278	0.459822
113300	112500	0.582344
113300	113200	0.592194
113300	174200	0.585222
113300	176240	0.579068
113300	186300	0.621275
113301	108900	0.656618
113301	178650	0.515791
113301	212090	0.459747
113301	275595	0.513868
113301	601347	0.352792
113301	607941	0.506677
113310	112600	0.585575
113310	112910	0.634759
113310	223610	0.543866
113310	301940	0.54281
113310	309630	0.570802
113400	117360	0.582983
113400	164100	0.533825
113400	164150	0.543105
113400	172850	0.491803
113400	178330	0.534776
113400	212900	0.619431
113400	213002	0.510603
113400	220219	0.447333
113400	240800	0.523279
113450	108120	0.502615
113450	119800	0.488109
113450	184252	0.519621
113450	246000	0.506851
113450	607354	0.54421
113450	608970	0.320264
113470	102520	0.473836
113470	163850	0.449711
113470	217520	0.469962
113470	228940	0.420341
113470	247410	0.427324
113470	309300	0.433977
113475	112600	0.662435
113475	112800	0.770242
113475	156520	0.490748
113475	158100	0.653283
113475	190680	0.768235
113475	272150	0.682925
113477	121070	0.685547
113477	152950	0.649446
113477	158300	0.508628
113477	180870	0.661888
113477	187500	0.440582
113477	193530	0.499728
113477	208080	0.543171
113477	208081	0.551257
113477	211180	0.599972
113477	227280	0.483132
113477	227330	0.588585
113477	268850	0.560273
113477	272430	0.457793
113477	272620	0.571921
113477	300243	0.519725
113477	601680	0.537754
113477	602249	0.590856
113477	603396	0.612303
113477	603572	0.603858
113477	606232	0.602881
113477	606242	0.550109
113480	107200	0.572715
113480	227200	0.606976
113480	244200	0.537777
113480	301700	0.805294
113480	603572	0.531529
113500	184095	0.534823
113500	184250	0.518263
113500	184252	0.647835
113500	223800	0.580869
113500	250600	0.53416
113500	252300	0.462576
113500	313400	0.58453
113500	602475	0.447203
113500	607326	0.600225
113600	113620	0.381831
113600	113650	0.384734
113600	128700	0.583643
113600	136500	0.390792
113600	602588	0.441131
113610	117210	0.446203
113610	125370	0.480582
113610	149400	0.378491
113610	159700	0.43691
113610	183086	0.425636
113610	312920	0.548071
113620	113600	0.381831
113620	113650	0.559971
113620	129900	0.547207
113620	225000	0.548238
113620	309800	0.558267
113620	311200	0.553207
113650	113600	0.384734
113650	113620	0.559971
113650	166780	0.494215
113650	167500	0.513796
113650	191830	0.42577
113650	202650	0.508802
113650	301590	0.543752
113670	113700	0.382988
113670	117900	0.393343
113670	163600	0.642572
113670	163700	0.413599
113670	187750	0.357765
113700	107600	0.475042
113700	113670	0.382988
113700	129550	0.465849
113700	163600	0.497721
113700	181270	0.491853
113700	225280	0.495786
113705	114480	0.499632
113705	114500	0.517128
113705	120435	0.482437
113705	151623	0.454724
113705	180200	0.469033
113705	210900	0.469229
113750	116850	0.768083
113750	133800	0.723704
113750	139100	0.45466
113750	180600	0.995942
113750	191480	0.703631
113750	194300	0.746336
113750	210750	0.70369
113750	227220	0.764573
113750	227240	0.956559
113750	260555	0.543287
113750	261990	0.703564
113750	266350	0.628117
113750	276880	0.563135
113750	600771	0.549213
113800	124200	0.520813
113800	146590	0.578453
113800	146800	0.588678
113800	600648	0.554877
113800	607654	0.498145
113900	140400	0.544775
113900	234700	0.422398
113900	602067	0.46913
113900	603642	0.388986
113900	604559	0.523945
113900	608567	0.395895
113950	140400	0.558244
113950	209600	0.46519
113950	602087	0.57795
113950	604363	0.459683
113950	608988	0.406693
113970	136580	0.559467
113970	148000	0.431304
113970	151390	0.593027
113970	151441	0.509202
113970	601083	0.453835
113970	604474	0.641641
113970	608232	0.468694
114000	156230	0.497027
114000	191400	0.481534
114000	249700	0.486655
114000	602361	0.44377
114000	605946	0.412669
114030	105250	0.456451
114030	162210	0.661529
114030	162220	0.522318
114030	162260	0.731874
114030	162270	0.60136
114030	171420	0.500997
114030	193520	0.586821
114030	209700	0.542488
114030	601321	0.543995
114030	607151	0.390388
114100	118750	0.650324
114100	193680	0.504463
114100	221820	0.485978
114100	260300	0.506922
114100	261630	0.536317
114100	270900	0.551275
114100	311510	0.520756
114100	606656	0.606717
114120	104500	0.629013
114120	130900	0.574996
114120	204690	0.568822
114120	204700	0.702536
114120	301200	0.648355
114140	127400	0.457448
114140	131705	0.639848
114140	131750	0.556677
114140	136000	0.573442
114140	169610	0.593252
114140	258840	0.564879
114150	146160	0.481868
114150	174700	0.645559
114150	175690	0.698075
114150	263450	0.677021
114150	607324	0.716231
114150	608562	0.650572
114200	112430	0.60507
114200	112700	0.697994
114200	126900	0.404443
114200	139750	0.572961
114200	140600	0.566396
114200	149100	0.531913
114200	178610	0.412604
114200	187390	0.573804
114200	228800	0.378414
114200	300378	0.44021
114290	108720	0.536378
114290	117650	0.515511
114290	207410	0.501685
114290	224400	0.519933
114290	228520	0.506061
114290	241500	0.469119
114290	309350	0.529187
114300	100050	0.545931
114300	108110	0.547276
114300	119500	0.684179
114300	147800	0.592267
114300	178110	0.512039
114300	208150	0.556018
114300	224400	0.589868
114300	228930	0.546659
114300	245600	0.616401
114300	259780	0.42762
114300	265000	0.592928
114300	268670	0.457417
114300	300004	0.513281
114300	302380	0.613172
114300	304120	0.574485
114300	309583	0.59343
114300	601427	0.457541
114300	605311	0.517982
114300	607552	0.538589
114400	114500	0.575965
114400	120435	0.516768
114400	176807	0.522537
114400	250650	0.494344
114400	260350	0.459575
114400	604370	0.451939
114400	608456	0.472071
114450	148390	0.525906
114450	277465	0.59591
114450	278760	0.494524
114450	278780	0.578843
114450	600630	0.702158
114480	102660	0.404414
114480	113705	0.499632
114480	120435	0.455961
114480	151623	0.438292
114480	155720	0.440209
114480	176807	0.510791
114480	211410	0.384499
114480	259500	0.420453
114480	273300	0.386246
114500	113705	0.517128
114500	114400	0.575965
114500	120435	0.50707
114500	120436	0.523899
114500	144700	0.466247
114500	175200	0.431698
114500	188550	0.465249
114500	606764	0.393663
114500	608456	0.482695
114550	142330	0.359651
114550	176100	0.44807
114550	194090	0.421537
114550	231100	0.424812
114550	602254	0.488773
114550	605982	0.412318
114580	158310	0.379498
114580	212050	0.516451
114580	247430	0.520136
114580	247450	0.570195
114580	247650	0.480789
114580	252250	0.478283
114600	125280	0.698828
114600	125350	0.781366
114600	146400	0.999522
114600	147300	0.773208
114600	154300	0.74117
114600	168200	0.754834
114600	184510	0.578456
114600	187000	0.758395
114600	194100	0.641455
114600	227000	0.411559
114600	231090	0.319476
114600	243185	0.351355
114600	248100	0.379585
114600	257790	0.412054
114600	273050	0.46994
114600	311750	0.574097
114600	313490	0.781196
114600	313550	0.999522
114600	314240	0.500074
114600	608615	0.573331
114620	122900	0.529118
114620	137270	0.396779
114620	155980	0.540087
114620	194000	0.511759
114620	219200	0.494758
114620	234800	0.451409
114620	278250	0.521893
114620	300244	0.453838
114620	600159	0.535577
114650	109160	0.458916
114650	111360	0.564009
114650	115300	0.555761
114650	123550	0.431096
114650	169200	0.628981
114650	176950	0.613715
114650	181200	0.547863
114650	217050	0.554761
114650	269300	0.516982
114650	272650	0.628981
114650	307830	0.550814
114650	314900	0.774687
114700	147300	0.766785
114700	147400	0.761362
114700	166750	0.57884
114700	168200	0.911519
114700	194100	0.689768
114700	231090	0.334631
114700	260950	0.466925
114700	272700	0.470591
114700	302400	0.766785
114700	313490	0.903673
114900	155240	0.459219
114900	162240	0.4113
114900	188550	0.432344
114900	234820	0.295498
114900	600634	0.497698
114900	603744	0.48658
115000	115080	0.490883
115000	133750	0.534278
115000	602087	0.398243
115000	603829	0.469544
115000	604772	0.418211
115080	115000	0.490883
115080	140400	0.595362
115080	192500	0.497079
115080	192600	0.489155
115080	194200	0.603842
115080	220400	0.404847
115080	600919	0.619334
115080	601144	0.507076
115080	603829	0.673129
115080	603830	0.603003
115150	153400	0.452496
115150	169400	0.409905
115150	235730	0.520655
115150	249630	0.523654
115150	300258	0.46515
115150	311200	0.51638
115150	601803	0.524938
115150	605627	0.52122
115150	608799	0.499666
115195	115196	0.597504
115195	115198	0.865804
115195	212130	0.78922
115195	608751	0.543408
115195	608758	0.528513
115196	115195	0.597504
115196	115197	0.603027
115196	115198	0.681718
115196	600858	0.588615
115196	608751	0.79522
115196	608758	0.778003
115197	115196	0.603027
115197	115198	0.612227
115197	600858	0.67158
115197	608751	0.646487
115197	608758	0.587791
115198	115195	0.865804
115198	115196	0.681718
115198	115197	0.612227
115198	212130	0.649678
115198	608751	0.635113
115198	608758	0.599709
115200	159001	0.469794
115200	192600	0.487145
115200	300257	0.449481
115200	600884	0.461965
115200	606685	0.459508
115210	302045	0.533962
115210	602067	0.56974
115210	604765	0.514329
115210	605275	0.511907
115210	607920	0.61278
115210	608807	0.653129
115250	146550	0.418405
115250	203650	0.455037
115250	208750	0.432469
115250	262000	0.458675
115250	605362	0.461191
115300	114650	0.555761
115300	125570	0.632192
115300	151590	0.388371
115300	206100	0.551996
115300	241600	0.401766
115300	245590	0.514714
115300	269300	0.56316
115300	314900	0.717184
115300	604324	0.400676
115310	118350	0.488142
[truncated: 37,460 more rows]
